1 **Exploring the genomic diversity and antimicrobial susceptibility of *Bifidobacterium***  
2 ***pseudocatenulatum* in the Vietnamese population to aid probiotic design**

3  
4 Hao Chung The <sup>1\*\*†</sup>, Chau Nguyen Ngoc Minh <sup>1\*</sup>, Chau Tran Thi Hong <sup>1</sup>, To Nguyen Thi Nguyen <sup>1</sup>,  
5 Lindsay J. Pike <sup>2</sup>, Caroline Zellmer <sup>3,4</sup>, Trung Pham Duc <sup>1</sup>, Tuan-Anh Tran <sup>1</sup>, Tuyen Ha Thanh <sup>1</sup>,  
6 Minh Pham Van <sup>1</sup>, Guy E. Thwaites <sup>1,5</sup>, Maia A. Rabaa <sup>1,5</sup>, Lindsay J. Hall <sup>6,7,8</sup>, and Stephen Baker <sup>2,3</sup>

7  
8 **Affiliations:**

9 <sup>1</sup> Oxford University Clinical Research Unit, Ho Chi Minh City, Vietnam

10 <sup>2</sup> The Wellcome Sanger Institute, Hinxton, Cambridge, United Kingdom

11 <sup>3</sup> University of Cambridge School of Clinical Medicine, Cambridge Biomedical Campus, Cambridge, United  
12 Kingdom

13 <sup>4</sup> Department of Medicine, University of Cambridge School of Clinical Medicine, Cambridge Biomedical Campus,  
14 Cambridge, United Kingdom

15 <sup>5</sup> Centre for Tropical Medicine and Global Health, Nuffield Department of Clinical Medicine, Oxford University,  
16 Oxford, United Kingdom

17 <sup>6</sup> Quadram Institute Biosciences, Norwich Research Park, Norwich, United Kingdom

18 <sup>7</sup> Norwich Medical School, University of East Anglia, Norwich Research Park, Norwich, United Kingdom

19 <sup>8</sup> Intestinal Microbiome, School of Life Sciences, ZIEL - Institute for Food & Health, Technical University of  
20 Munich, Freising, Germany

21

22 \* equal contribution

23 † Corresponding author: Dr. Hao Chung The, Department of Molecular Epidemiology, Oxford University Clinical  
24 Research Unit (OUCRU), 764 Vo Van Kiet, Ward 1, District 5, Ho Chi Minh City, Vietnam.

25 Tel: +84 969937143

Email: [haoct@oucru.org](mailto:haoct@oucru.org)

26

27 **Keywords:** *Bifidobacterium* genomic; *Bifidobacterium pseudocatenulatum*; *Bifidobacterium*  
28 antimicrobial resistance; *Bifidobacterium* probiotic; genomic diversity; developing country; probiotic  
29 design; glycosyl hydrolase; exopolysaccharide.

30

31 **Abstract**

32 *Bifidobacterium pseudocatenulatum* is a member of the human gut microbiota, and has previously been  
33 used as a probiotic to improve gut integrity and reduce inflammatory responses. We showed previously  
34 that *B. pseudocatenulatum* was significantly depleted during dysenteric diarrhea, suggesting the organism  
35 may aid in recovery from diarrhea. Here, in order to investigate its probiotic potential, we aimed to assess  
36 the genomic diversity and predicted metabolic profiles of *B. pseudocatenulatum* found colonizing the gut  
37 of healthy Vietnamese adults and children. We found that the population of *B. pseudocatenulatum* from  
38 each individual was distinct and highly diverse, with intra-clonal variation attributed to gain or loss of  
39 carbohydrate utilizing enzymes. The *B. pseudocatenulatum* genomes were enriched with glycosyl  
40 hydrolases that target plant-based non-digestible carbohydrates (GH13, GH43), but not host-derived  
41 glycans. Notably, the exopolysaccharide biosynthesis region from organisms isolated from healthy  
42 children showed greater genetic diversity, and was subject to a high degree of genetic modification.  
43 Antimicrobial susceptibility testing revealed that the Vietnamese *B. pseudocatenulatum* were uniformly  
44 susceptible to beta-lactams, but exhibited variable resistance to azithromycin, tetracycline, ciprofloxacin  
45 and metronidazole. The genomic presence of *ermX* and *tet* variants conferred resistance against  
46 azithromycin and tetracycline, respectively; ciprofloxacin resistance was associated with mutation(s) in  
47 the quinolone resistance determining region (GyrA, S115 and/or D119). Our work provides the first  
48 detailed genomic and antimicrobial resistance characterization of *B. pseudocatenulatum* found in the  
49 Vietnamese population, which could inform the next phase of rational probiotic design.

50 **Importance**

51 *Bifidobacterium pseudocatenulatum* is a probiotic candidate with potential applications in several health  
52 conditions, but its efficacy is largely strain-dependent and associated with distinct genomic and  
53 biochemical features. However, most commercial probiotics have been developed by Western institutions,  
54 which may not have ideal efficacy when administered in developing countries. This study taps into the  
55 underexplored diversity of the organism in Vietnam, and provides more understanding to its lifestyles and  
56 antimicrobial susceptibility. These data are key for selecting an optimal probiotic candidate, from our  
57 established collection, for downstream investigations and validation. Thus, our work represents a model  
58 in identifying and characterizing bespoke probiotics from an indigenous population in a developing  
59 setting.

## 60 **Introduction**

61 *Bifidobacterium* is a genus of Gram-positive non-spore forming anaerobic bacteria and among the most  
62 well-studied members of the human gut microbiota (1). These bacteria are among the major components  
63 of the gut microbiota and are transferred vertically from mothers to newborns. They are also measurably  
64 enriched in babies delivered vaginally, as compared to those delivered via caesarean section (2). Several  
65 health-promoting benefits are associated with *Bifidobacterium* colonization of the human gut. These  
66 benefits are associated with the production of secondary metabolites, immunomodulatory activities, and  
67 protection from infections (1, 3–5). The genus is composed of multiple human-adapted species, many of  
68 which colonize the gut during different life stages; this colonization pattern is largely dependent on the  
69 dominant carbohydrate sources available in the intestinal lumen (6). The saccharolytic lifestyle of  
70 *Bifidobacterium* can be observed by its ability to catabolize a wide variety of carbohydrates (from  
71 monosaccharides to complex plant-derived polysaccharides), which are ultimately channeled into a  
72 unique hexose metabolic pathway (“bifid shunt”) (7). This biochemical process permits the bacteria to  
73 generate more energy (in the form of ATP) from the same carbohydrate input, in comparison to the  
74 fermentative process found in other lactic acid bacteria (LAB) (7). Certain species and variants of  
75 *Bifidobacterium* are able to metabolize components of the early life diet, i.e. human milk oligosaccharides  
76 (HMO) present in breast milk, with *B. longum* subsp. *infantis* (8), *B. breve* (9), and *B. kashiwanohense*  
77 (10) enriched in the intestines of breast-fed infants. After weaning, *Bifidobacterium* ceases to predominate  
78 in the gut (11), and only species that can thrive on complex dietary carbohydrates are able to flourish.  
79 These species include *B. longum* subsp. *longum* (12, 13), *B. adolescentis*, and *B. pseudocatenulatum* (*Bp*).  
80  
81 *Bp* is less well characterized than other *Bifidobacterium* species, but is associated with several health  
82 benefits. Expansion of *Bp* in the gut microbiome was associated with successful weight loss in obese  
83 children in China following ~100-day fiber-rich dietary (FRD) interventions (14, 15). According to a  
84 recent clinical trial, *Bp* was also among the enriched short-chain fatty-acid (SCFA)-producing gut  
85 commensals in type-2 diabetes patients receiving FRD interventions (16). Additionally, experimental

86 evidence has demonstrated that supplementation with a *Bp* probiotic (CECT 7765) in obese mice led to  
87 improved metabolic responses (lowering serum cholesterol, triglyceride, and glucose concentrations) (17)  
88 and reduced pro-inflammatory cytokines (IL-17A and TNF- $\alpha$ ) (18). A further trial in obese Spanish  
89 children with insulin resistance demonstrated that treatment with the same probiotic resulted in a  
90 comparable improvement in inflammatory status (19). Moreover, recent studies demonstrated that oral  
91 administration of *Bp* enhanced gut barrier integrity and alleviated bacterial translocation in mice with  
92 induced liver damage (20, 21).

93

94 In a recent microbiome study, we found that *Bp* was consistently depleted in the gut microbiomes of  
95 Vietnamese children suffering from dysenteric (mucoïd and/or bloody) diarrhea(22). This association  
96 remained significant regardless of etiological agent. Dysenteric diarrhea is associated with heightened  
97 inflammation, and we hypothesized that *Bp* may be beneficial in reducing inflammation-associated  
98 conditions and accelerating recovery of the gut microbiota following diarrhea. The efficacy of *Bp* as a  
99 probiotic is largely strain-dependent and associated with distinct genome composition and biochemical  
100 profile (23). However, most commercially available probiotics have been developed by Western  
101 institutions, which may not have ideal gut colonization and efficacy when administered in tropical or  
102 developing countries. Therefore, aiming to generate data to support the development of a candidate *Bp*  
103 probiotic suitable for use in treating/preventing dysenteric diarrhea(24), we assessed the genetic diversity  
104 of *Bp* colonizing the guts of healthy Vietnamese children and adults. Here, we defined the genetic  
105 diversity, predicted biochemical profile, and antimicrobial susceptibility of the *Bp* population in the  
106 Vietnamese population. These data are key for selecting an optimal probiotic candidate for downstream  
107 investigations and validation, with particular consideration for its potential uses in LMICs in Southeast  
108 Asia.

109

## 110 **Results**

111 *The abundance of Bifidobacterium pseudocatenulatum in the Vietnamese population*

112 In order to investigate the distribution and diversity of *Bifidobacterium* spp. in the gut microbiota of  
113 Vietnamese adults and children, we extracted total DNA from fecal samples collected from 42 healthy  
114 Vietnamese individuals (21 children and 21 adults) and subjected them to shotgun metagenomic  
115 sequencing. All recruited children were aged between 9 and 59 months (median: 23 [interquartile range: 9  
116 – 37] months) and had been weaned onto a solid food diet for at least three months. All recruited adults  
117 were aged between 25 and 59 years (median: 35 years) and reported having an omnivorous diet.  
118 Taxonomic profiling from the microbiome data demonstrated that *Bifidobacterium* species were more  
119 abundant in children compared to adults (median relative abundances; 8.0% [3.8 – 19.7], and 1.2% [0.3 –  
120 3.4], respectively) (Fig 1). Specifically, we found that *Bp* was the most prevalent *Bifidobacterium* species  
121 in the adults (mean = 1.1%) and the second-most prevalent *Bifidobacterium* species in children (mean =  
122 2.9%, after *B. longum*).

123

#### 124 *The phylogenetic distribution of Vietnamese Bifidobacterium pseudocatenulatum*

125 We selected fecal samples from participants with a relative *Bp* abundance >0.1% (n=16) to isolate  
126 *Bifidobacterium*. In total, we isolated 185 individual organisms with a colony morphology indicative of  
127 *Bifidobacterium*. Among these, 49 isolates (from 7 children and 6 adults) were *Bp* according to MALDI-  
128 TOF bacterial identification and full-length sequencing of the 16S rRNA (Fig 1). These 49 individual  
129 organisms were subjected to whole genome sequencing (WGS). A preliminary phylogenetic  
130 reconstruction using a core-genome alignment segregated the organisms into two distinct lineages (Fig  
131 S1). The majority of isolates (n=45) clustered with two *Bp* reference genomes (DSM20438 and  
132 CECT\_7756) within the major lineage. The remaining four isolates (C01\_H5, C01\_D5, C01\_C5,  
133 C02\_A8) formed a separate cluster that was distantly related to the major lineage. Further interrogation  
134 and comparison with *B. catenulatum* and *B. kashiwanohense* genomes confirmed that these four isolates  
135 belonged to the *B. catenulatum* spp. complex (Fig S2).

136

137 Refined phylogenetic reconstruction of the 45 *Bp* genomes identified 13 phylogenetic clusters (PCs) and  
138 three singletons (C14\_S, A05\_S, A16\_S) (Fig 2), all of which were supported by high bootstrap values  
139 (>80%). For ease of nomenclature, these PCs and singletons were collectively called PCs. Each PC was  
140 defined by close genetic relatedness (negligible branch lengths), and each contained organisms isolated  
141 exclusively from a single individual. However, isolates recovered from each sampled participant were  
142 either solely restricted to one PC (6/11 participants) or distributed across two PCs (5/11). Moreover, when  
143 multiple PCs were detected within the same individual, they were generally not monophyletic (except for  
144 C16). These data suggest that the *Bp* population within each individual is highly diverse, and PCs could  
145 not be distinguished based on the age of the participant (child versus adult).

146

#### 147 *In silico prediction of carbohydrate utilization*

148 *Bifidobacterium* spp. are renowned for their ability to utilize a diverse range of carbohydrates, which  
149 contribute to the functional integrity of the human gut. We focused on identifying the repertoire of  
150 carbohydrate utilizing enzymes (CAZymes) within the *Bp* genome sequences to predict the carbohydrate  
151 metabolic capacity of each isolate. Among 4,333 gene families in the pangenome, 233 were determined to  
152 be CAZymes. These included 126 glycosyl hydrolases (GH), 97 glycosyltransferases (GT), two  
153 carbohydrate esterases, and two carbohydrate binding motif (CBM) containing proteins. As GHs catalyze  
154 the breakdown of glycosidic bonds, they are essential for the assimilation of complex glycans. We  
155 mapped the presence of all GH genes in each isolate of the *Bp* (45 Vietnamese and 7 reference isolates)  
156 and *B. catenulatum* (C01 and C02 clusters) collections. Genes pertaining to GH23 and GH25 were  
157 excluded from interpretation as they participate specifically in the recycling of the peptidoglycan in the  
158 bacterial cell wall.

159

160 Thirty-four GH genes were classified as core (present in all 52 *Bp* genomes), while accessory GH genes  
161 were more enriched in  $\leq 10$  genomes (Fig S3). The predominant GH families identified were GH13  
162 (median of 12 copies per isolate) and GH43 (median of 10.5 copies per isolate), followed by GH3

163 (median of 5 copies per isolate) (Fig 2). GH13 mainly catalyze the hydrolysis of  $\alpha$ -glucosidic linkages (in  
164 resistant starch and  $\alpha$ -glycans), while GH3 is involved in the assimilation of cellobiose and cellodextrin.  
165 GH43 includes a diverse range of  $\alpha$ -L-arabinofuranosidase,  $\beta$ -xylosidase, and xylanase involved in the  
166 degradation of hemicellulose, arabinogalactan, arabinan, and arabinoxylan. In contrast, GH targeting host-  
167 derived glycans (GH29, GH33, GH35, and GH95) were not detected this *Bp* collection. These data,  
168 coupled with the variable presence of other GH families (GH31, GH32, GH36, GH42, GH51, and GH77),  
169 signify a tropism for dietary starch and fiber in the catabolism of these organisms.

170

### 171 *Genomic variation within the phylogenetic cluster*

172 Given that the phylogeny was generated from the core genome, we considered that isolates belonging to  
173 the same PC have limited variation in the core genome but may have substantial variation within their  
174 accessory genomes. This genetic variation may underlie major phenotypic differences within a single  
175 clone. We investigated the presence/absence of accessory genes in the pangenome of each PC and found  
176 that the distribution of such variation was not uniform. Inter-strain variation was found to be minimal for  
177 7/13 non-singleton PCs ( $\leq 26$  differences) (Fig 3A). This limited genetic diversity may be attributed to  
178 insufficient sampling coverage; however, more intensive sampling, as demonstrated in the A11\_cluster  
179 (six isolates), still resulted in low variation in the pangenome. These differences in intra-clonal gene  
180 content were typically associated with genes encoding carbohydrate transport (ABC transporter and  
181 permease) and utilization proteins (GH, GT, esterase), or were of unknown function (6 – 25 hypothetical  
182 proteins per PC). Alternatively, the bimodal distribution observed in the A05\_cluster, A07\_cluster, and  
183 A10\_cluster demonstrates that while most organisms share limited variation in gene content ( $\sim 12$  genes),  
184 outlier organisms may carry a distinct accessory genome. This observation resulted in sizeable differences  
185 when comparing the outlier to the remainders in each PC. For example, the accessory genome of  
186 A05\_D12 (A05\_cluster) differed from that of the remaining five isolates by  $>100$  genes. This  
187 composition of genes arose from a recombination event (spanning 28 kbp from 2,126,733 to 2,154,962 in



188 the DSM20438 chromosome and containing multiple ABC transporters and GHs) and the gain of an IS3-  
189 mediated region (ABC transporters and  $\beta$ -glucosidase), which distinguished A05\_D12 from the other  
190 isolates.

191  
192 Most noticeably, the C04\_cluster contained a wide distribution of pairwise-differences across the  
193 pangenome, indicating that each isolate possessed a moderately divergent accessory genome. To visualize  
194 the magnitude of lateral gene transfer, we separately reconstructed the phylogeny of the C04\_cluster (Fig  
195 S4). Branch lengths indicative of significant divergence, coupled with a high frequency of gene  
196 acquisition and gene loss events, demonstrate that the C04 *Bp* population has undergone extensive clonal  
197 expansion. This micro-evolution underlies a diversifying metabolic potential, as exemplified by the  
198 concurrent acquisition of a GH78 (rhamnosidase) and deletion of a GH51 (arabinosidase) in a specific  
199 monophyletic cluster (Fig 2 and S4). Notably, a novel ribulose-5P-3-epimerase gene was acquired in the  
200 most recent common ancestor (MRCA) of C04\_A7 and C04\_D7. This enzyme bilaterally converts  
201 ribulose-5-P to xylulose-5P, a key intermediate in the *Bifidobacterium* specific hexose metabolic pathway  
202 (bifid shunt) (7), thus potentially facilitating a greater energy harvest. We aimed to identify the genetic  
203 origin of the acquired elements (by BLAST to public database) and found that *B. kashiwanohense* and *B.*  
204 *adolescentis* were the most likely sources.

205  
206 We hypothesized that the extent of intra-PC variation in the accessory genome was dependent on the  
207 evolutionary timeframe of the PC, which is reflected in the number of core genome SNPs the PC has  
208 accumulated since its MRCA. Within the examined PCs, the median of pairwise recombination-free SNPs  
209 was 9 (IQR [13 – 49]), while the median variation in the pangenome was 24 genes (IQR [13 – 97]). As  
210 shown in Figure 3B, the pairwise difference in the accessory genome partially correlated with the  
211 pairwise SNP distance (Pearson's  $r = 0.54$ ). An outlier to this trend was in the A05\_cluster (retrieved  
212 from a 59-year-old female), in which A05\_D12 was >400 SNPs away from the remaining five closely  
213 related isolates, albeit with only ~100 gene differences in the accessory genome. These findings suggest

214 that as the *Bp* population undergoes a prolonged period of within-host evolution and expansion, its pan-  
215 genome may expand through increasing horizontal gene transfer (HGT).

216

### 217 *Genomic differences in Bifidobacterium pseudocatenulatum originating from children and adults*

218 The differing physiologies and diets of children and adults create distinct niches in which *Bifidobacterium*  
219 can adapt, and such adaptation may be reflected by genomic variation. An exploratory analysis of 21  
220 representative isolates (10 from adults, 11 from children) identified 42 genes with differing abundance  
221 between *Bp* originating from children and adults. Of these 42 genes, 13 were of unknown function. Eight  
222 genes (4 glycosyltransferases, a polysaccharide export *rfbX*, an O-acetyltransferase, a reductase, and *fhiA*)  
223 were more frequently present in bacteria retrieved from adults (6/10 representative clusters), compared to  
224 those from children (1/11 representative clusters) (Fisher's Exact test,  $p=0.024$ ). These genes formed the  
225 core component of the exopolysaccharide (EPS) biosynthesis cluster of the reference strain DSM20438  
226 (Fig 4). We characterized this genomic region of all representative *Bp* in detail and confirmed that the  
227 EPS region in organisms from adults was more similar to that of DSM20438 (Table 1). In organisms  
228 isolated from both adults and children, the EPS cluster was subject to frequent modification, with  
229 integrations of genes derived from the EPS region of other *Bifidobacterium* species, such as *B. longum*  
230 and *B. kashiwanohense*. Notably, the rhamnose precursor biosynthesis genes (*rmlABC*) were present in  
231 isolates of three clusters (C03\_cluster\_1, A07\_cluster, A16\_cluster), which predicts the incorporation of  
232 rhamnose or rhamnose-derived sugar in the EPS structure (25). Organisms of distantly related PCs  
233 occasionally shared comparable EPS regions, as observed in A05\_S and the A11\_cluster. Specifically, the  
234 EPS region of C03\_cluster\_1 was similar to that of *Bp* CECT\_7765, which has been developed as a  
235 probiotic candidate to alleviate inflammatory responses in patients with cirrhosis and obesity in Spain(19,  
236 26).

237

238 Two additional genes were found to be enriched in *Bp* isolated from adults (8/10), compared to that from  
239 children (3/11) (Fisher's Exact test,  $p=0.03$ ). These two tandem genes (BBPC\_RS09395 and

240 BBPC\_RS08115 in the reference DSM20438) both encode for GH43. RS09395 is a large multi-domain  
241 protein (>2,000 aa) and consists of three GH43 subunits. Among these, two subunits shared >70%  
242 nucleotide identity with the  $\alpha$ -L-arabinofuranosidases, *arafB* (BLLJ\_1853, GH43\_22) and *arafE*  
243 (BLLJ\_1850, GH43\_34), of *B. longum* JCM1217, which encode for degradative enzymes targeting the  
244 arabinan backbone and arabinoxylan, respectively (27). The remaining GH43\_22 subunit of RS09395  
245 showed no ortholog in *B. longum* and shared 65% amino acid identity to that in *B. catulorum*. In contrast,  
246 RS08115 was smaller (~1,000 aa) and shared 65% nucleotide identity with *arafA* (BLLJ\_1854,  
247 GH43\_22) of *B. longum* JCM1217, known to specifically degrade arabinogalactan (28). Bioinformatic  
248 analyses predicted that both RS09395 and RS08115 were secreted and bound to the bacterial cell  
249 membrane, due to the presence of N-terminal signal peptide and transmembrane motifs. These data  
250 suggest that these two enzymes synergistically degrade arabinoglycan, releasing degradants (i.e. L-  
251 arabinose) into the extracellular milieu and contributing to cross-feeding with other members of the gut  
252 microbiota.

253

#### 254 *Antimicrobial susceptibility of representative Bifidobacterium pseudocatenulatum*

255 To better evaluate their suitability for probiotic design, specifically to assess if they can be formulated  
256 along with antimicrobial treatments, we subjected the isolated *Bp* to antimicrobial susceptibility profiling.  
257 We reported a broad range of MICs against ceftriaxone, amoxicillin/clavulanate, ciprofloxacin,  
258 azithromycin, tetracycline, and metronidazole for 19 representative isolates (17 *Bp*, 2 *B. catenulatum*)  
259 (Table 2). Notably, the MICs for ceftriaxone ( $\leq 1.5$   $\mu\text{g/mL}$ ) and amoxicillin/clavulanate ( $\leq 0.25$   $\mu\text{g/mL}$ )  
260 were consistently low, likely indicating that all tested *Bifidobacterium* would be susceptible to these  
261  $\beta$ -lactams during antimicrobial therapy. In contrast, susceptibility against the remaining antimicrobials  
262 was more variable, as evidenced by their broader MIC ranges. The highest MICs for ciprofloxacin (32  
263  $\mu\text{g/mL}$ ) and metronidazole (256  $\mu\text{g/mL}$ ) were observed in 57% (11/19) of tested *Bifidobacterium* isolates

264 (Table 2). Concurrent non-susceptibility against ciprofloxacin (MIC = 32 µg/mL), azithromycin (MIC =  
265 256 µg/mL), and metronidazole (MIC = 256 µg/mL) was observed in four isolates.

266  
267 We examined the correlation between MIC values and inhibitory zone diameters (IZD) for the six  
268 aforementioned antimicrobials (Figure 5). The narrow range of recorded values for  
269 amoxicillin/clavulanate (0.047 - 0.25 µg/mL, 36 – 48 mm) and ceftriaxone (0.094 - 1.5 µg/mL, 28 – 40  
270 mm) resulted in a weak to modest negative correlation (Kendall's  $r \geq -0.5$ ). Such correlation appeared to  
271 be stronger for azithromycin, tetracycline, and ciprofloxacin (Kendall's  $r \leq -0.7$ ), likely owing to a wider  
272 range of MIC and IZD values. Specifically, for ciprofloxacin, an MIC value of 32 µg/mL corresponded  
273 with an IZD of 6 mm (no killing zone), while the remaining MIC (0.5 – 2 µg/mL) corresponded with  
274 IZDs >18 mm. In contrast, a poorer correlation was observed with metronidazole despite presenting a  
275 similarly broad range of MIC values, such that an IZD of 6 mm corresponded with a wide range of MICs  
276 (12 – 256 µg/mL). These results showed that, with exception of metronidazole, both E-test and disc  
277 diffusion methods produce robust and consistent interpretations for antimicrobial susceptibility in these  
278 *Bifidobacterium*.

279

#### 280 *Antimicrobial resistance genetic determinants in Bifidobacterium pseudocatenulatum*

281 We lastly sought to investigate potential mechanisms of antimicrobial resistance (AMR) in the sequenced  
282 *Bifidobacterium*. As resistance to metronidazole is complex and typically attributed to altered metabolism  
283 (29), we only focused on the genetic determinants for resistance against tetracycline, azithromycin, and  
284 ciprofloxacin. Screening against a curated database of acquired AMR genes revealed the presence of *tetO*  
285 and *ermX* in our isolates. The presence of *tetO* correlated significantly with elevated MIC and decreased  
286 IZD against tetracycline, while the presence of *ermX* was associated with a decrease in azithromycin IZD  
287 (Figure 6). As ciprofloxacin resistance is commonly induced by mutations in the quinolone resistance  
288 determining region (QRDR) on bacterial topoisomerases (30–32), we screened *gyrA*, *gyrB*, *parC*, and  
289 *parE* in the assembled *Bifidobacterium* genomes to identify nonsynonymous mutations in the QRDR.

290 This analysis detected the presence of non-synonymous mutations in *gyrA*. These included single  
291 mutations such as S115F (n=5), S115V (n=1), S115Y (n=1), and D119G (n=3), as well as a double  
292 mutation, S115F - D119G (n=1). Upon classifying the isolates based on the presence of the  
293 aforementioned mutations, we found that their presence significantly correlated with elevated MIC (32  
294 µg/mL) and reduced IZD (6 mm) (Figure 6). These data indicate that the presence of *tetO*, *ermX*, and  
295 specific mutations in *gyrA* in our *Bifidobacterium* collection explain non-susceptibility against  
296 tetracycline, azithromycin, and ciprofloxacin, respectively.

297

## 298 **Discussion**

299 Our study is among the first to use the combination of anaerobic microbiology and genomics to study the  
300 diversity and antimicrobial susceptibility of a *Bifidobacterium* species in a developing country setting and  
301 identifies candidate therapeutic probiotics that may be relevant for Southeast Asia. We found that the *B.*  
302 *pseudocatenulatum* population within each individual is distinct and diverse. Intra-clonal variation in the  
303 pangenome usually stems from the gains or losses of glycosyl hydrolases and associated carbohydrate  
304 transporters, thus creating divergent metabolic functions, even for isolates within the same evolving  
305 clone. Our results reiterate previous findings on the genomic characterization of the *Bifidobacterium*  
306 genus (6) and *Bp* in the European population (33), showing that the species harbors an expansive  
307 repertoire of enzymes (GH13, GH43) responsible for the assimilation of complex plant-derived  
308 carbohydrates, but not host-derived glycan (mucin, HMO). In line with this observation, experimental  
309 study showed that *Bp* could utilize several components of arabinoxylan hydrolysates (AXH), via the  
310 upregulation of three GH43 – ABC transporter clusters (34). This feature likely explains the abundance  
311 and persistence of *Bp* through adulthood in the Vietnamese gut microbiota, since the organism may thrive  
312 on non-digestible carbohydrates enriched with fruits and vegetables.

313

314 We found that enzymes homologous to *B. longum* α-L-arabinofuranosidases (ArafA, ArafB, and ArafE)  
315 are potentially more abundant in adult-derived *Bp*, which reflects the adaptation of the species to the more

316 complex fiber-rich diet usually present in adulthood. Similarly, a micro-evolution study of *B. longum*  
317 *subsp. longum* in Japan highlighted the enrichment of these homologs in strains derived from an elderly  
318 population (12). The above evidence could suggest a pattern of convergent evolution across different  
319 *Bifidobacterium* species, indicative of adaptation to resource availability. As these enzymes were  
320 predicted to be secreted in our *Bp* isolates, they may facilitate cross-feeding pathways with other bacteria  
321 incapable of utilizing complex arabinoglycan hydrolysates. Metabolic cross-feeding has been noted in  
322 *Bifidobacterium*, in which the fermentation end-products lactate and acetate can be utilized by anaerobes  
323 *Eubacterium hallii* (35) and *Faecalibacterium prausnitzii* (36), respectively, to produce butyrate.  
324 Likewise, *Bp* capable of degrading HMO were shown to release simpler metabolites, which supported the  
325 growth of other *Bifidobacterium* strains from the same breast-fed individual (33).

326  
327 The EPS biosynthesis region was present in all recovered *Bp* genomes; this region is subjected to a high  
328 degree of genetic modification. The genetic composition of the EPS region is potentially more diverse in  
329 child-derived *Bp*, possibly owing to a greater extent of HGT in the *Bifidobacterium*-predominant gut  
330 microbiota in children. Previous studies have found that the EPS structure is critical for elucidating the  
331 *Bifidobacterium*-host interaction. In a simulated human intestinal environment, genes related to EPS  
332 biosynthesis were substantially up-regulated (37). The surface EPS grants protection against low pH and  
333 bile salt in the gastrointestinal environment (38, 39). Moreover, the presence of EPS in *B. breve* was  
334 associated with lower proinflammatory cytokines and antibody responses, which facilitate its persistent  
335 colonization in mouse models (38). However, it is known that *Bifidobacterium* with different EPS  
336 structures, even within a single species, can elicit differing immunological responses *in vitro* (40). For  
337 example, high-molecular-weight EPS is more likely to induce weaker immune responses, potentially  
338 because these encapsulating structures shield the complex protein antigens on the bacterial surface from  
339 interaction with immune cells (41). Furthermore, a specific EPS from *B. breve* has been shown to be  
340 metabolized by some members of the infant gut microbiota, indicating that EPS further facilitates cross-  
341 feedings between gut bacteria (42). Therefore, the considerable diversity shown by different EPS genomic

342 characterizations in our *Bp* collection suggests the induction of varying and strain-dependent  
343 immunological responses within the human host. Recently, rhamnose-rich EPS were shown to elicit a  
344 moderate secretion of pro-inflammatory cytokines, prompting a mild boost to innate immunity (43). The  
345 EPS genomic clusters of the well-researched probiotic CECT7765, which has demonstrated a variety of  
346 health-promoting traits (19, 26), and several of our *Bp* isolates carried the *rmlABC* locus responsible for  
347 rhamnose biosynthesis. Future studies should investigate whether different rhamnose-rich EPS in  
348 *Bifidobacterium* confer similar impacts on inflammatory responses and ultimately on host health.  
349  
350 Our findings concur with previous studies on AMR in *Bifidobacterium*, showing that the carriage of *ermX*  
351 (44) and *tet* variants (45, 46) is common in the genus. These elements induce decreased susceptibility to  
352 azithromycin and tetracycline, respectively, which we confirmed in our study and has been observed in  
353 previous investigations (47). We also report a high prevalence of metronidazole resistance in these  
354 Vietnamese *Bp*. Metronidazole resistance in *Bifidobacterium* has been observed occasionally (48) and  
355 was recently reported in *Bp* causing pyogenic infections (49), but the resistance mechanism remains  
356 elusive. In addition, we showed here that mutation(s) in the QRDR of *gyrA* (S115 and/or D119) are likely  
357 to stimulate increased resistance to ciprofloxacin in *Bifidobacterium*. The encompassing region SAIYD  
358 (position 115 – 119 in *GyrA*) in wildtype *Bp* corresponds to the conserved SA[X]YD (83 – 87) in  
359 *Escherichia coli*'s *GyrA*, the most well-studied QRDR (32). However, unlike *E. coli*, which requires  
360 triple mutations (two in *gyrA*, one in *parC*) for full ciprofloxacin resistance ( $\geq 2 \mu\text{g/mL}$ ), a single mutation  
361 in *Bp* may elevate ciprofloxacin MIC to  $\geq 32 \mu\text{g/mL}$  ( $>16$  fold increase). The ease of such a single-step  
362 process may explain the high degree of independent resistant mutations across different clones.  
363 Ciprofloxacin, azithromycin, and metronidazole are frequently prescribed for treatment of various  
364 infections in Vietnam. Prolonged exposure to these antimicrobials could induce resistance in  
365 *Bifidobacterium*, facilitated by the mobility of resistance determinants in the gut microbiota environment  
366 (46, 50). Though several studies have investigated the disturbance and recovery of the gut microbiome  
367 post-antibiotic treatment (51, 52), it is unknown how AMR in specific gut commensals (i.e.

368 *Bifidobacterium*) impacts upon these ecological trajectories. Multi-drug resistance, which was observed in  
369 some recovered *Bp* may translate into higher survivability during a course of respective antimicrobial  
370 treatment, accelerating the recovery of the gut microbiota. Further studies are needed to test this  
371 hypothesis, especially given the potential high prevalence of AMR in *Bifidobacterium* in developing  
372 country settings.

373

374 There are limitations to our study. Since the study design was cross-sectional, we were not able to  
375 investigate the micro-evolution and population structure of *Bifidobacterium* within each participant over  
376 time. Our study is limited to genomic profiling, so further work is needed to validate *in-silico* predictions  
377 related to carbohydrate utilization and the EPS interaction with host cells. These drawbacks  
378 notwithstanding, we have a detailed collection of Vietnamese *Bp*, from which a probiotic candidate could  
379 be developed. This approach allowed us to tap into the diversity of resident *Bifidobacterium* within an  
380 indigenous population, for whom the probiotics or microbiome-targeted complementary foods will  
381 benefit. It also ensures that the candidates are well-tolerated and compatible with the local food matrix,  
382 maximizing its likelihood to colonize the target population. For instance, *Lactiplantibacillus plantarum*  
383 ATCC 202195, isolated from an Indian infant, was shown to colonize the neonatal gut for up to four  
384 months when orally administered with fructooligosaccharides (FOS) (53). This synbiotic (*L. plantarum* +  
385 FOS) proved successful in reducing the incidence of sepsis and death in rural Indian neonates, according  
386 to results published in a large scale randomized trial (54). Certain additional features may be considered  
387 when selecting a *Bp* candidate for development, including immunomodulatory potential (EPS similarity  
388 to other efficacious probiotics), metabolic flexibility (extensive glycosyl hydrolase content), survivability  
389 under antimicrobial pressures (multi-drug resistance), and contribution to overall gut health (production  
390 of acetate)(4). Thorough understanding on *Bp*'s metabolic capability allows for rational synbiotic design,  
391 which optimizes the bacterial survival and colonization in the gut. Regarding AMR, strains with  
392 resistance to metronidazole (epigenetic regulation) and/or ciprofloxacin (QRDR mutations) are more  
393 fitting as these resistance determinants are not transferrable to other members of the gut microbiota.



394

395 Our study represents the primary step in identifying and characterizing potential bespoke probiotics from  
396 a developing country. This approach could be applied to develop microbiome-mediated therapeutics for  
397 other conditions in alternative locations, which will tap into the diversity and functionality held within the  
398 gut microbiota of those residing in LMICs, an area which is currently underexplored.

## 399 **Materials and Methods**

### 400 **Study design and sample collection**

401 Samples in this study originated from a cross-sectional study (from May to June 2017) to investigate the  
402 gut microbiomes of a healthy Vietnamese population. The study recruited healthy Vietnamese adults aged  
403 18 to 60, who were at the time employed at the Oxford University Clinical Research Unit (OUCRU), Ho  
404 Chi Minh City, Vietnam and who were a parent or guardian of a child aged 9 to 60 months for whom they  
405 also consented to be enrolled in this study. Written informed consent was obtained from the adult  
406 participants and from the parent/guardian on behalf of child participants. Participants who had used  
407 antimicrobials in the three months prior to recruitment, or those who have or were recovering from  
408 chronic intestinal disease, chronic autoimmune disease or allergies were excluded from the study. Adults  
409 who experienced gastrointestinal infections in the last six months were also excluded. Based on these  
410 exclusion criteria, eligibility for study participation was self-assessed by the study participants.

411 Recruitment was coordinated by a sample manager who ensured participant and specimen anonymity to  
412 other study staff. The study eventually recruited 21 adult and 21 child participants. Ethical approval for  
413 this study was obtained from the Oxford Tropical Research Ethics Committee (OxTREC, ID: 505-17).

414  
415 Stool samples were collected from participants using non-invasive procedures. Briefly, participants were  
416 provided with a Proctocult Collection Device (Ability Building Center, USA), including a transport  
417 container and a Ziploc bag. Specimens were labelled (with participant initials and date of collection) by  
418 the participants or their parent/guardian and stored in the freezer until delivery to OUCRU laboratories.

419

### 420 **Shotgun metagenomic sequencing and analysis**

421 Total DNA extraction was performed on freshly collected stool samples (n=42) using the FastDNA Spin  
422 Kit for Soil (MP Biomedicals, USA) following the manufacturer's procedures. These include a bead-  
423 beating step on a Precellys 24 homogenizer (Bertin Instruments, France). All DNA samples were then  
424 shipped to the Wellcome Trust Sanger Institute (WTSI, Hinxton, United Kingdom) for shotgun

425 metagenomic sequencing on the Illumina HiSeq2000 platform. All output sequencing libraries were  
426 subjected to and passed the quality check on the WTSI pipeline. Taxonomic profiling was performed  
427 using the read-based Kraken approach (55) on a curated database of human gut microbial genomes, which  
428 include representative genomes (to species level) from the RefSeq database and ones sequenced from the  
429 collection in the Lawley lab (WTSI) (56).

430

### 431 ***Bifidobacterium* culture and identification**

432 Samples with reads attributed to *Bifidobacterium pseudocatenulatum* (Bp) above 0.1% of total sequenced  
433 reads (7 adults, 9 children) were subjected to *Bifidobacterium* anaerobic culturing, using a Whitley A35  
434 anaerobic workstation (Don Whitley Scientific, United Kingdom) containing 5% CO<sub>2</sub>, 10% hydrogen and  
435 85% nitrogen gas. Briefly, fecal samples were homogenized in PBS (0.1 g stool per ml of PBS), and  
436 several ten-fold dilutions (10<sup>-4</sup> to 10<sup>-7</sup>) were plated onto de Man Rogosa and Sharpe (MRS) media (BD  
437 Difco, USA) supplemented with 50 mg/L of mupirocin (PanReac AppliChem, Germany) and L-  
438 cysteine.HCl (Sigma-Aldrich, Germany) (13). Plates were incubated at 37°C for 48 hours, and ~10  
439 different colonies were randomly picked from each fecal sample and re-streaked on new MRS plates to  
440 confirm purity. For each of these individual bacterial isolates, taxonomic identities were confirmed on the  
441 matrix assisted laser desorption/ionization time-of-flight mass spectrometer (MALDI-TOF, Bruker). In  
442 addition, each isolate was subjected to full-length 16S rRNA gene PCR and capillary sequencing, using  
443 the primer pair 7F (5'-AGAGTTTGATYMTGGCTCAG-3') and 1510R (5'-  
444 ACGGYTACCTTGTTACGACTT-3') (56). *Bifidobacterium* species identity was confirmed by  
445 comparing the output sequence with the NCBI 16S rRNA gene database. In total, 185 isolates were  
446 confirmed as *Bifidobacterium* species, of which 49 were *B. pseudocatenulatum* (as identified by both  
447 methods).

448

449 **Whole genome sequencing, pangenome analysis and phylogenetic inference of *Bifidobacterium***  
450 ***pseudocatenulatum***

451 Forty-nine confirmed *Bp* isolates were subjected to DNA extraction using the Wizard Genomic Extraction  
452 Kit (Promega, USA). For whole genome sequencing (WGS), one nanogram of extracted DNA from each  
453 isolate was input into the Nextera XT library preparation kit to create the sequencing library, as per the  
454 manufacturer's instruction. The normalized libraries were pooled and then sequenced on an Illumina  
455 MiSeq platform to generate 250bp paired-end reads.

456  
457 The sequencing quality of each read pair was checked using FASTQC (57), and Trimmomatic v0.36 was  
458 used to remove sequencing adapters and low quality reads (paired end option, SLIDINGWINDOW:10:20,  
459 MINLEN:50) (58). For each trimmed read set, *de novo* genome assembly was constructed separately  
460 using SPAdes v3.12.0, with the error correction option and default parameters (59). Annotation for each  
461 assembly was performed using Prokka v1.13, using input of other well-annotated *Bifidobacterium*  
462 sequences as references (60). The pangenome of 49 sequenced *B. pseudocatenulatum*, together with  
463 public references of the species (DSM20438, CECT\_7765, and five assembled genomes from a micro-  
464 evolution study in China (15)), was determined using panX with default settings (61). In brief, panX  
465 reconstructs individual gene trees, and uses these in an adaptive post-processing step to scale the  
466 thresholds relative to the core genome diversity, instead of relying on a specific single nucleotide identity  
467 cut-off. The resulting core-genome (1116 single-copy genes, 137,285 SNPs) was input into RAxML  
468 v8.2.4 to construct a maximum likelihood phylogeny of all 56 queried genomes, under the GTRGAMMA  
469 model with 500 rapid bootstrap replicates (62). This phylogeny delineates the separation of two lineages,  
470 major (n=52) and minor (n=4).

471  
472 To accurately identify the taxonomic identity of the four isolates belonging to the minor lineage (C01\_D5,  
473 C01\_H5, C01\_C5, and C02\_A8), we used panX and RAxML as described above to infer the core-  
474 genome phylogeny of these four isolates together with several *Bifidobacterium* references. These include  
475 *B. adolescentis* 15703, *B. pseudocatenulatum* (DSM20438, 12), *B. catenulatum* (MC1, BCJG468, 1899B,  
476 DSM16992, HGUT, BIOMLA1, BIOMLA2, JG), and *B. kashiwanohense* (JCM15439, APCKJ1, PV20-

477 2). For the remaining 52 strains, we mapped each read set to the reference DSM20438, using BWA-MEM  
478 with default parameters, and SNPs were detected and filtered using SAMtools v1.3 and bcftools v1.2  
479 (63). PICARD was used to remove duplicate reads, and GATK was employed for indel realignment, as  
480 previously recommended (64). Low quality SNPs were removed if they matched any of these criteria:  
481 consensus quality < 50, mapping quality < 30, read depth < 4, and ratio of SNPs to reads at a position <  
482 90%. Bedtools v2.24.0 was used to summarize the mapping coverage at each position in the reference  
483 (65). A pseudo-sequence (with length equal to that of the mapping reference) was created for each isolate  
484 to integrate the filtered SNPs, region of low mapping coverage, and invariant sites, using the vcf2fa  
485 python script (--min\_cov=4, <https://github.com/brevans/vcf2fa>). Together with the mapping reference,  
486 pseudo-sequences were concatenated to create an alignment, which was then input into ClonalFrameML  
487 (branch extension model; kappa = 9.305, emsim=100, embranch dispersion = 0.1) to remove regions  
488 affected by recombination (66). This created a SNP alignment of 10,716 bp, which served as input for  
489 RAxML to infer a maximum likelihood phylogeny of 45 *sensu stricto* *Bp*, under the GTRGAMMA model  
490 with 500 rapid bootstrap replicates (5 iterations). In addition, seven isolates belonging to the C04\_cluster  
491 were subjected to mapping (to DSM20438) and SNP calling, using the aforementioned parameters. The  
492 resulting alignment was input into Gubbins to remove regions of recombination (67), followed by  
493 maximum likelihood reconstruction using RAxML.

494

#### 495 **Determination of carbohydrate-active enzymes and antimicrobial resistance determinants**

496 Representatives from each gene family (n=4,333), as identified in the pangenome by panX as described  
497 above, were input into the dbCAN2 metaserver (<http://ccb.unl.edu/dbCAN2/blast.php>) to annotate genes  
498 involved in carbohydrate utilization (68). These carbohydrate active enzymes (CAZymes) include  
499 glycosyl hydrolases (GH), glycosyl transferase (GT), glycosyl lyase and esterase. A candidate gene was  
500 considered a CAZyme if the dbCAN2 output returned any positive hits from the three detection  
501 algorithms: HHMER, Hotpep, and DIAMOND. In addition, assembled genomes were screened by  
502 ARIBA against a curated resistance determinant database (ResFinder) to detect the presence of acquired

503 resistance genes (--nucmer\_min\_id = 95, --nucmer\_min\_len = 50) (69, 70). QRDR mutations were  
504 manually screened by aligning the *gyrA*, *gyrB*, *parC*, and *parE* homologs of sequenced genomes,  
505 retrieved from the constructed pangenome analysis.

506

### 507 **Antimicrobial susceptibility testing of *Bifidobacterium***

508 For each PC, we selected one representative isolate for antimicrobial susceptibility testing, except for the  
509 case of C16\_cluster\_1, in which two isolates were included because they showed different genetic  
510 composition in the EPS biosynthesis cluster (17 *B. pseudocatenulatum* and 2 *B. catenulatum*). Four  
511 control strains were also included: *B. pseudocatenulatum* DSM20438, *B. longum subsp. longum* NCIMB  
512 8809, *Staphylococcus aureus* ATCC 25923, and *S. aureus* ATCC 29213. Strains were maintained in  
513 Brain Heart Infusion (BHI) with 20% glycerol at -80°C prior to resuscitation on MRS and Luria-Bertani  
514 agar (Oxoid, UK), for *Bifidobacterium* and *S. aureus*, respectively. LSM-cysteine formulation (90% Iso-  
515 Sensitest broth [Oxoid, UK] and 10% MRS broth, supplemented with 0.3g/l L-cysteine.HCl, with pH  
516 adjusted to  $6.85 \pm 0.1$ ) was chosen for antimicrobial susceptibility testing of *Bifidobacterium*, as  
517 recommended previously (71). Muller-Hinton (MH) media was chosen for testing of *S. aureus*. Prior to  
518 testing, strains were pre-cultured on LSM-cysteine agar (48 hours for *Bifidobacterium*) or MH agar (24  
519 hours for *S. aureus*) under the specified incubation conditions.

520

521 For the disc diffusion method, inocula were prepared by suspending *Bifidobacterium* colonies from LSM-  
522 cysteine plates into 5ml of 0.85% NaCl solution (adjusted to McFarland standard 1), which were then  
523 spread onto LSM-cysteine plates (72). Subsequently, antimicrobial discs (Biomeriux, France), including  
524 ceftriaxone (30µg), ciprofloxacin (5µg), tetracycline (30µg), amoxicillin/clavulanic acid (30µg),  
525 azithromycin (15µg), and metronidazole (5µg) were applied. Plates were incubated under anaerobic  
526 conditions for 48h at 37°C, followed by measurement of the diameters of the inhibition zones, including  
527 the diameter of the disc (mm). For each isolate, the procedures were repeated five times to evaluate day-  
528 to-day reproducibility of the method, with reproducibility defined as percentage of samples within  $\pm 4$  mm

529 variation in zone diameter (72). For E-tests, inocula were prepared as described above, and the  
530 resuspended solution was spread onto LSM-cysteine plates. Plates were left to dry for ~15 minutes, after  
531 which E-test strips were applied (ceftriaxone, ciprofloxacin, tetracycline, amoxicillin/clavulanic acid,  
532 azithromycin, and metronidazole; Biomeriux, France). The MIC ( $\mu\text{g/ml}$ ) was assessed after 48-hours  
533 incubation, with MIC defined as the value corresponding to the first point on the E-test strip where  
534 growth did not occur along the inhibition ellipse.

535

### 536 **Data analysis and visualization**

537 All data analyses were conducted in R (73) using multiple packages, including ggplot2 and ggtree for  
538 visualization (74, 75). To compare the accessory gene content between child- and adult-derived *Bp*, we  
539 selected a representative genome from each of the identified phylogenetic clusters (PCs) in the *Bp*  
540 phylogeny (Figure 2, n=16). We also included one additional genome for PCs showing high intra-clonal  
541 variation in the accessory genome (A05\_cluster\_1, A10\_cluster, C04\_cluster, C16\_cluster\_1,  
542 C16\_cluster\_2). This resulted in a set of 21 independent genomes (adult: 10, child: 11). Only gene  
543 families (as identified by panX) that are present in five to sixteen genomes (n=606) were considered for  
544 statistical testing (Fisher's exact test) to investigate the differences in genetic composition of the two  
545 groups (child vs. adult). Due to the limited number of tested genomes, correction for multiple hypothesis  
546 testing was not employed, and we reported candidates with p value  $\leq 0.05$  as indicating potential  
547 differences.

548

549 Artemis and Artemis Comparison Tool (ACT) were utilized to visualize the presence of selected genetic  
550 elements in the genomes (76). The EPS biosynthesis cluster was defined as a genomic region flanked by  
551 the priming glycosyltransferase *rfbP* or *cpsD*, and encompassing several GTs, polysaccharide export *rfbX*,  
552 oligosaccharide repeat unit polymerase, tyrosine kinase, and tyrosine phosphatase (37, 41). This region  
553 was extracted from targeted *Bifidobacterium* genomes, and queried against the NCBI public database

554 using BLASTN to identify the most similar variants. Comparisons between different EPS regions were  
555 visualized by Easyfig (77).



556 **Funding details**

557 HCT is a Wellcome International Training Fellow (218726/Z/19/Z). LJH is supported by Wellcome Trust  
558 Investigator Awards (100974/C/13/Z and 220876/Z/20/Z); the Biotechnology and Biological Sciences  
559 Research Council (BBSRC), Institute Strategic Programme Gut Microbes and Health (BB/R012490/1),  
560 and its constituent projects BBS/E/F/000PR10353 and BBS/E/F/000PR10356. SB is a Wellcome Senior  
561 Research Fellow (215515/Z/19/Z).

562

563 **Disclosure of potential conflicts of interest**

564 The authors report no potential conflicts of interest.

565

566 **Acknowledgements**

567 The authors wish to thank all participants and their parents/guardians for their participation in the study,  
568 and Dr. Magdalena Kujawska for her advice in *Bifidobacterium* culturing.

569

570 **Data availability**

571 Raw sequence data are available in the NCBI Sequence Read Archive (project PRJNA720750: Genomic  
572 diversity of *Bifidobacterium pseudocatenulatum* in the Vietnamese population).

573 **References**

- 574 1. **Wong CB, Odamaki T, Xiao JZ.** 2020. Insights into the reason of Human-Residential  
575 Bifidobacteria (HRB) being the natural inhabitants of the human gut and their potential health-  
576 promoting benefits. *FEMS Microbiol Rev* **44**:369–385.
- 577 2. **Shao Y, Forster SC, Tsaliki E, Vervier K, Strang A, Simpson N, Kumar N, Stares MD,**  
578 **Rodger A, Brocklehurst P, Field N, Lawley TD.** 2019. Stunted microbiota and opportunistic  
579 pathogen colonization in caesarean-section birth. *Nature* **574**:117–121.
- 580 3. **O'Neill I, Schofield Z, Hall LJ.** 2017. Exploring the role of the microbiota member  
581 *Bifidobacterium* in modulating immune-linked diseases. *Emerg Top Life Sci* **1**:333–349.
- 582 4. **Fukuda S, Toh H, Hase K, Oshima K, Nakanishi Y, Yoshimura K, Tobe T, Clarke JM,**  
583 **Topping DL, Suzuki T, Taylor TD, Itoh K, Kikuchi J, Morita H, Hattori M, Ohno H.** 2011.  
584 Bifidobacteria can protect from enteropathogenic infection through production of acetate. *Nature*  
585 **469**:543–549.
- 586 5. **Asahara T, Shimizu K, Nomoto K, Hamabata T, Ozawa A, Takeda Y.** 2004. Probiotic  
587 Bifidobacteria Protect Mice from Lethal Infection with Shiga Toxin-Producing *Escherichia coli*  
588 O157 : H7. *Infect Immun* **72**:2240–2247.
- 589 6. **Milani C, Turrone F, Duranti S, Lugli GA, Mancabelli L, Ferrario C, Van Sinderen D,**  
590 **Ventura M.** 2016. Genomics of the genus *Bifidobacterium* reveals species-specific adaptation to  
591 the glycan-rich gut environment. *Appl Environ Microbiol* **82**:980–991.
- 592 7. **Pokusaeva K, Fitzgerald GF, Van Sinderen D.** 2011. Carbohydrate metabolism in  
593 Bifidobacteria. *Genes Nutr* **6**:285–306.
- 594 8. **Sela DA, Chapman J, Adeuya A, Kim JH, Chen F, Whitehead TR, Lapidus A, Rokhsar DS,**  
595 **Lebrilla CB, German JB, Price NP, Richardson PM, Mills DA.** 2008. The genome sequence of  
596 *Bifidobacterium longum* subsp. *infantis* reveals adaptations for milk utilization within the infant  
597 microbiome. *Proc Natl Acad Sci* **105**:18964–18969.
- 598 9. **James K, Motherway MOC, Bottacini F, Van Sinderen D.** 2016. *Bifidobacterium breve*

- 599 UCC2003 metabolises the human milk oligosaccharides lacto-N-tetraose and lacto-N-neo-tetraose  
600 through overlapping, yet distinct pathways. *Sci Rep* **6**:1–16.
- 601 10. **James K, Bottacini F, Contreras JIS, Vigoureux M, Egan M, Motherway MO, Holmes E,**  
602 **van Sinderen D.** 2019. Metabolism of the predominant human milk oligosaccharide  
603 fucosyllactose by an infant gut commensal. *Sci Rep* **9**:1–20.
- 604 11. **Dogra S, Sakwinska O, Soh S-E, Ngom-bru C, Brück M, Berger B, Brüssow H, Karnani N,**  
605 **Lee YS, Yap F, Chong Y, Godfrey KM, Holbrook JD, Dogra S, Sakwinska O, Soh S, Ngom-**  
606 **bru C, Brück M, Berger B, Brüssow H, Karnani N, Lee YS, Yap F, Chong Y, Godfrey KM,**  
607 **Holbrook JD, Dogra S, Sakwinska O, Soh S, Ngom-bru C, Brück WM, Lee YS, Yap F,**  
608 **Chong S, Godfrey KM, Joanna D.** 2015. Rate of establishing the gut microbiota in infancy has  
609 Consequences for Future Health. *Gut Microbes* **6**:321–325.
- 610 12. **Odamaki T, Bottacini F, Kato K, Mitsuyama E, Yoshida K, Horigome A, Xiao JZ, Van**  
611 **Sinderen D.** 2018. Genomic diversity and distribution of *Bifidobacterium longum* subsp. *longum*  
612 across the human lifespan. *Sci Rep* **8**:1–12.
- 613 13. **Kujawska M, La Rosa SL, Roger LC, Pope PB, Hoyles L, McCartney AL, Hall LJ.** 2020.  
614 Succession of *Bifidobacterium longum* Strains in Response to a Changing Early Life Nutritional  
615 Environment Reveals Dietary Substrate Adaptations. *iScience* **23**:101368.
- 616 14. **Zhang C, Yin A, Li H, Wang R, Wu G, Shen J, Zhang M, Wang L, Hou Y, Ouyang H,**  
617 **Zhang Y, Zheng Y, Wang J, Lv X, Wang Y, Zhang F, Zeng B, Li W, Yan F, Zhao Y, Pang X,**  
618 **Zhang X, Fu H, Chen F, Zhao N, Hamaker BR, Bridgewater LC, Weinkove D, Clement K,**  
619 **Dore J, Holmes E, Xiao H, Zhao G, Yang S, Bork P, Nicholson JK, Wei H, Tang H, Zhang**  
620 **X, Zhao L.** 2015. Dietary Modulation of Gut Microbiota Contributes to Alleviation of Both  
621 Genetic and Simple Obesity in Children. *EBioMedicine* **2**:968–984.
- 622 15. **Wu G, Zhang C, Wu H, Wang R, Shen J, Wang L, Zhao Y, Pang X, Zhang X, Zhao L,**  
623 **Zhang M.** 2017. Genomic Microdiversity of *Bifidobacterium pseudocatenulatum* Underlying  
624 Differential Strain-Level Responses to Dietary Carbohydrate. *MBio* **8**:1–14.

- 625 16. **Zhao L, Zhang F, Ding X, Wu G, Lam YY, Wang X, Fu H, Xue X, Lu C, Ma J, Yu L, Xu C,**  
626 **Ren Z, Xu Y, Xu S, Shen H, Zhu X, Shi Y, Shen Q, Dong W, Liu R, Ling Y, Zeng Y, Wang**  
627 **X, Zhang Q, Wang J, Wang L, Wu Y, Zeng B, Wei H, Zhang M, Peng Y, Zhang C.** 2018. Gut  
628 bacteria selectively promoted by dietary fibers alleviate type 2 diabetes. *Science* (80- ) **359**:1151–  
629 1156.
- 630 17. **Cano PG, Santacruz A, Trejo FM, Sanz Y.** 2013. Bifidobacterium CECT 7765 improves  
631 metabolic and immunological alterations associated with obesity in high-fat diet-fed mice. *Obesity*  
632 **21**:2310–2321.
- 633 18. **Moya-Pérez A, Neef A, Sanz Y.** 2015. Bifidobacterium pseudocatenulatum CECT 7765 Reduces  
634 Obesity-Associated Inflammation by Restoring the Lymphocyte-Macrophage Balance and Gut  
635 Microbiota Structure in High-Fat Diet-Fed Mice. *PLoS One* **10**:e0126976.
- 636 19. **Sanchis-Chordà J, del Pulgar EMG, Carrasco-Luna J, Benítez-Páez A, Sanz Y, Codoñer-**  
637 **Franch P.** 2018. Bifidobacterium pseudocatenulatum CECT 7765 supplementation improves  
638 inflammatory status in insulin-resistant obese children. *Eur J Nutr* **0**:0.
- 639 20. **Moratalla A, Gómez-Hurtado I, Santacruz A, Moya Á, Peiró G, Zapater P, González-**  
640 **Navajas JM, Giménez P, Such J, Sanz Y, Francés R.** 2014. Protective effect of Bifidobacterium  
641 pseudocatenulatum CECT7765 against induced bacterial antigen translocation in experimental  
642 cirrhosis. *Liver Int* **34**:850–858.
- 643 21. **Fang D, Shi D, Lv L, Gu S, Wu W, Chen Y, Guo J, Li A, Hu X, Guo F, Ye J, Li Y, Li L.**  
644 2017. Bifidobacterium pseudocatenulatum LI09 and Bifidobacterium catenulatum LI10 attenuate  
645 D-galactosamine-induced liver injury by modifying the gut microbiota. *Sci Rep* **7**:1–13.
- 646 22. **Chung The H, Sessions PF de, Jie S, Thanh DP, Thompson CN, Minh CNN, Chu CW, Tran**  
647 **T-A, Thomson NR, Thwaites GE, Rabaa MA, Hibberd M, Baker S.** 2017. Assessing gut  
648 microbiota perturbations during the early phase of infectious diarrhea in Vietnamese children. *Gut*  
649 *Microbes* **9**:1–17.
- 650 23. **Brüssow H.** 2019. Probiotics and prebiotics in clinical tests: An update. *F1000Research* **8**:1–9.

- 651 24. **Sybesma W, Kort R, Lee YK.** 2015. Locally sourced probiotics, the next opportunity for  
652 developing countries? *Trends Biotechnol* **33**:197–200.
- 653 25. **Altmann F, Kosma P, O’Callaghan A, Leahy S, Bottacini F, Molloy E, Plattner S, Schiavi E,**  
654 **Gleinser M, Groeger D, Grant R, Perez NR, Healy S, Svehla E, Windwarder M, Hofinger A,**  
655 **Motherway MOC, Akdis CA, Xu J, Roper J, Van Sinderen D, O’Mahony L.** 2016. Genome  
656 analysis and characterisation of the exopolysaccharide produced by *bifidobacterium longum*  
657 subsp. *longum* 35624<sup>TM</sup>. *PLoS One* **11**:1–23.
- 658 26. **Moratalla A, Caparrós E, Juanola O, Portune K, Puig-Kröger A, Estrada-Capetillo L, Bellot**  
659 **P, Gómez-Hurtado I, Piñero P, Zapater P, González-Navajas JM, Such J, Sanz Y, Francés**  
660 **R.** 2016. *Bifidobacterium pseudocatenulatum* CECT7765 induces an M2 anti-inflammatory  
661 transition in macrophages from patients with cirrhosis. *J Hepatol* **64**:135–145.
- 662 27. **Komeno M, Hayamizu H, Fujita K, Ashida H.** 2019. Two Novel  $\alpha$ -L-Arabinofuranosidases  
663 from *Bifidobacterium longum* subsp. *longum* belonging to Glycoside Hydrolase Family 43  
664 Cooperatively Degrade Arabinan. *Appl Environ Microbiol* **85**:e02582-18.
- 665 28. **Fujita K, Sakamoto A, Kaneko S, Kotake T, Tsumuraya Y, Kitahara K.** 2019. Degradative  
666 enzymes for type II arabinogalactan side chains in *Bifidobacterium longum* subsp. *longum*. *Appl*  
667 *Microbiol Biotechnol* **103**:1299–1310.
- 668 29. **Dingsdag SA, Hunter N.** 2018. Metronidazole: an update on metabolism, structure-cytotoxicity  
669 and resistance mechanisms. *J Antimicrob Chemother* **73**:265–279.
- 670 30. **Redgrave LS, Sutton SB, Webber MA, Piddock LJ V.** 2014. Fluoroquinolone resistance:  
671 Mechanisms, impact on bacteria, and role in evolutionary success. *Trends Microbiol* **22**:438–445.
- 672 31. **Oh H, El Amin N, Davies T, Appelbaum PC, Edlund C.** 2001. *gyrA* mutations associated with  
673 quinolone resistance in *Bacteroides fragilis* group strains. *Antimicrob Agents Chemother* **45**:1977–  
674 1981.
- 675 32. **Aldred KJ, Kerns RJ, Osheroff N.** 2014. Mechanism of quinolone action and resistance.  
676 *Biochemistry* **53**:1565–1574.

- 677 33. **Lawson MAE, O'Neill IJ, Kujawska M, Javvadi SG, Wijeyesekera A, Flegg Z, Chalklen L,**  
678 **Hall LJ.** 2020. Breast milk-derived human milk oligosaccharides promote *Bifidobacterium*  
679 interactions within a single ecosystem. *ISME J* **14**:653–648.
- 680 34. **Saito Y, Shigehisa A, Watanabe Y, Tsukuda N, Moriyama-Ohara K, Hara T, Matsumoto S,**  
681 **Tsuji H, Matsuki T.** 2020. Multiple Transporters and Glycoside Hydrolases Are Involved in  
682 Arabinoxylan-Derived Oligosaccharide Utilization in *Bifidobacterium pseudocatenulatum*. *Appl*  
683 *Environ Microbiol* **86**:1–11.
- 684 35. **Belenguer A, Duncan SH, Calder AG, Holtrop G, Louis P, Lobley GE, Flint HJ.** 2006. Two  
685 routes of metabolic cross-feeding between *Bifidobacterium adolescentis* and butyrate-producing  
686 anaerobes from the human gut. *Appl Environ Microbiol* **72**:3593–3599.
- 687 36. **Kim H, Jeong Y, Kang S, You HJ, Ji GE.** 2020. Co-culture with *bifidobacterium catenulatum*  
688 improves the growth, gut colonization, and butyrate production of *faecalibacterium prausnitzii*: In  
689 vitro and in vivo studies. *Microorganisms* **8**.
- 690 37. **Ferrario C, Milani C, Mancabelli L, Lugli GA, Duranti S, Mangifesta M, Viappiani A,**  
691 **Turrone F, Margolles A, Ruas-Madiedo P, Sinderen D van, Ventura M.** 2016. Modulation of  
692 the eps-ome transcription of bifidobacteria through simulation of human intestinal environment.  
693 *FEMS Microbiol Ecol* **92**:1–12.
- 694 38. **Fanning S, Hall LJ, Cronin M, Zomer A, MacSharry J, Goulding D, O'Connell Motherway**  
695 **M, Shanahan F, Nally K, Dougan G, van Sinderen D.** 2012. *Bifidobacterium* surface-  
696 exopolysaccharide facilitates commensal-host interaction through immune modulation and  
697 pathogen protection. *Proc Natl Acad Sci* **109**:2108–2113.
- 698 39. **Tahoun A, Masutani H, El-Sharkawy H, Gillespie T, Honda RP, Kuwata K, Inagaki M,**  
699 **Yabe T, Nomura I, Suzuki T.** 2017. Capsular polysaccharide inhibits adhesion of  
700 *Bifidobacterium longum* 105-A to enterocyte-like Caco-2 cells and phagocytosis by macrophages.  
701 *Gut Pathog* **9**:1–17.
- 702 40. **López P, Monteserín DC, Gueimonde M, de los Reyes-Gavilán CG, Margolles A, Suárez A,**

- 703 **Ruas-Madiedo P.** 2012. Exopolysaccharide-producing Bifidobacterium strains elicit different in  
704 vitro responses upon interaction with human cells. *Food Res Int* **46**:99–107.
- 705 41. **Hidalgo-Cantabrana C, Sánchez B, Milani C, Ventura M, Margolles A, Ruas-Madiedo P.**  
706 2014. Genomic overview and biological functions of exopolysaccharide biosynthesis in  
707 bifidobacterium spp. *Appl Environ Microbiol* **80**:9–18.
- 708 42. **Püngel D, Treveil A, Dalby MJ, Caim S, Colquhoun IJ, Booth C, Ketskemety J, Korcsmaros**  
709 **T, Sinderen D Van, Lawson MAE, Hall LJ.** 2020. Bifidobacterium breve UCC2003  
710 Exopolysaccharide Modulates the Early Life Microbiota by Acting as a Potential Dietary  
711 Substrate. *Nutrients*.
- 712 43. **Balzaretti S, Taverniti V, Guglielmetti S, Fiore W, Minuzzo M, Ngo HN, Ngere JB, Sadiq S,**  
713 **Humphreys PN, Laws AP.** 2017. A Novel Rhamnose-Rich Hetero- exopolysaccharide Isolated  
714 from *Lactobacillus paracasei* DG Activates THP-1 Human Monocytic Cells. *Appl Environ*  
715 *Microbiol* **83**:1–15.
- 716 44. **van Hoek AHAM, Mayrhofer S, Domig KJ, Aarts HJM.** 2008. Resistance determinant erm(X)  
717 is borne by transposon Tn5432 in *Bifidobacterium thermophilum* and *Bifidobacterium animalis*  
718 subsp. lactis. *Int J Antimicrob Agents* **31**:544–548.
- 719 45. **Gueimonde M, Sánchez B, de los Reyes-Gavilán CG, Margolles A.** 2013. Antibiotic resistance  
720 in probiotic bacteria. *Front Microbiol* **4**:1–6.
- 721 46. **Kazmierczak KA, Flint HJ, Scott KP.** 2006. Comparative analysis of sequences flanking tet(W)  
722 resistance genes in multiple species of gut bacteria. *Antimicrob Agents Chemother* **50**:2632–2639.
- 723 47. **Moubareck C, Gavini F, Vaugien L, Butel MJ, Doucet-Populaire F.** 2005. Antimicrobial  
724 susceptibility of bifidobacteria. *J Antimicrob Chemother* **55**:38–44.
- 725 48. **Delgado S, Flórez AB, Mayo B.** 2005. Antibiotic susceptibility of *Lactobacillus* and  
726 *Bifidobacterium* species from the human gastrointestinal tract. *Curr Microbiol* **50**:202–207.
- 727 49. **Butta H, Sardana R, Vaishya R, Singh KN, Mendiratta L.** 2017. Bifidobacterium: An  
728 Emerging Clinically Significant Metronidazole-resistant Anaerobe of Mixed Pyogenic Infections.

- 729 Cureus **9**:4–9.
- 730 50. **Mancino W, Lugli GA, van Sinderen D, Ventura M, Turrone F.** 2019. Mobilome and  
731 resistome reconstruction from genomes belonging to members of the Bifidobacterium genus.  
732 Microorganisms **7**.
- 733 51. **Dethlefsen L, Relman DA.** 2011. Incomplete recovery and individualized responses of the human  
734 distal gut microbiota to repeated antibiotic perturbation. Proc Natl Acad Sci U S A **108**:4554–  
735 4561.
- 736 52. **Chng KR, Ghosh TS, Tan YH, Nandi T, Lee IR, Ng AHQ, Li C, Ravikrishnan A, Lim KM,  
737 Lye D, Barkham T, Raman K, Chen SL, Chai L, Young B, Gan YH, Nagarajan N.** 2020.  
738 Metagenome-wide association analysis identifies microbial determinants of post-antibiotic  
739 ecological recovery in the gut. Nat Ecol Evol.
- 740 53. **Panigrahi P, Parida S, Pradhan L, Mohapatra SS, Misra PR, Johnson JA, Chaudhry R,  
741 Taylor S, Hansen NI, Gewolb IH.** 2008. Long-term colonization of a lactobacillus plantarum  
742 synbiotic preparation in the neonatal gut. J Pediatr Gastroenterol Nutr **47**:45–53.
- 743 54. **Panigrahi P, Parida S, Nanda NC, Satpathy R, Pradhan L, Chandel DiS, Baccaglioni L,  
744 Mohapatra A, Mohapatra SS, Misra PR, Chaudhry R, Chen HH, Johnson JA, Morris JG,  
745 Paneth N, Gewolb IH.** 2017. A randomized synbiotic trial to prevent sepsis among infants in  
746 rural India. Nature **548**:407–412.
- 747 55. **Wood DE, Salzberg SL.** 2014. Kraken: ultrafast metagenomic sequence classification using exact  
748 alignments. Genome Biol **15**:R46.
- 749 56. **Browne HP, Forster SC, Anonye BO, Kumar N, Neville BA, Stares MD, Goulding D, Lawley  
750 TD.** 2016. Culturing of ‘unculturable’ human microbiota reveals novel taxa and extensive  
751 sporulation. Nature **533**:in press.
- 752 57. **Andrews S.** FastQC: A Quality Control Tool for High Throughput Sequence Data.
- 753 58. **Bolger AM, Lohse M, Usadel B.** 2014. Trimmomatic: A flexible trimmer for Illumina sequence  
754 data. Bioinformatics **30**:2114–2120.



- 755 59. **Bankevich A, Nurk S, Antipov D, Gurevich A a., Dvorkin M, Kulikov AS, Lesin VM,**  
756 **Nikolenko SI, Pham S, Prjibelski AD, Pyshkin A V., Sirotkin A V., Vyahhi N, Tesler G,**  
757 **Alekseyev M a., Pevzner P a.** 2012. SPAdes: A New Genome Assembly Algorithm and Its  
758 Applications to Single-Cell Sequencing. *J Comput Biol* **19**:455–477.
- 759 60. **Seemann T.** 2014. Prokka: rapid prokaryotic genome annotation. *Bioinformatics* **30**:2068–9.
- 760 61. **Ding W, Baumdicker F, Neher RA.** 2018. panX : pan-genome analysis and exploration. *Nucleic*  
761 *Acids Res* **46**:1–12.
- 762 62. **Stamatakis A.** 2014. RAxML version 8: a tool for phylogenetic analysis and post-analysis of  
763 large phylogenies. *Bioinformatics* **30**:1312–3.
- 764 63. **Li H, Handsaker B, Wysoker A, Fennell T, Ruan J, Homer N, Marth G, Abecasis G, Durbin**  
765 **R.** 2009. The Sequence Alignment/Map format and SAMtools. *Bioinformatics* **25**:2078–9.
- 766 64. **McKenna A, Hanna M, Banks E, Sivachenko A, Cibulskis K, Kernytsky A, Garimella K,**  
767 **Altshuler D, Gabriel S, Daly M, DePristo M.** 2010. The Genome Analysis Toolkit: A  
768 MapReduce framework for analyzing next-generation DNA sequencing data. *Genome Res*  
769 **20**:1297–303.
- 770 65. **Quinlan AR, Hall IM.** 2010. BEDTools: A flexible suite of utilities for comparing genomic  
771 features. *Bioinformatics* **26**:841–842.
- 772 66. **Didelot X, Wilson DJ.** 2015. ClonalFrameML: Efficient Inference of Recombination in Whole  
773 Bacterial Genomes. *PLoS Comput Biol* **11**:1–18.
- 774 67. **Croucher NJ, Page a. J, Connor TR, Delaney a. J, Keane J a., Bentley SD, Parkhill J,**  
775 **Harris SR.** 2014. Rapid phylogenetic analysis of large samples of recombinant bacterial whole  
776 genome sequences using Gubbins. *Nucleic Acids Res* **44**:1–13.
- 777 68. **Huang L, Zhang H, Wu P, Entwistle S, Li X, Yohe T, Yi H, Yang Z, Yin Y.** 2018. DbCAN-  
778 seq: A database of carbohydrate-active enzyme (CAZyme) sequence and annotation. *Nucleic*  
779 *Acids Res* **46**:D516–D521.
- 780 69. **Zankari E, Hasman H, Cosentino S, Vestergaard M, Rasmussen S, Lund O, Aarestrup FM,**

- 781           **Larsen MV**. 2012. Identification of acquired antimicrobial resistance genes. *J Antimicrob*  
782           *Chemother* **67**:2640–4.
- 783   70.   **Hunt M, Mather AE, Sánchez-Busó L, Page AJ, Parkhill J, Keane JA, Harris SR**. 2017.  
784           ARIBA: Rapid antimicrobial resistance genotyping directly from sequencing reads. *Microb*  
785           *Genomics* **3**:1–11.
- 786   71.   **Klare I, Konstabel C, Müller-Bertling S, Reissbrodt R, Huys G, Vancanneyt M, Swings J,**  
787           **Goossens H, Witte W**. 2005. Evaluation of new broth media for microdilution antibiotic  
788           susceptibility testing of lactobacilli, pediococci, lactococci, and bifidobacteria. *Appl Environ*  
789           *Microbiol* **71**:8982–8986.
- 790   72.   **Domig KJ, Mayrhofer S, Zitz U, Mair C, Petersson A, Amtmann E, Mayer HK, Kneifel W.**  
791           2007. Antibiotic susceptibility testing of *Bifidobacterium thermophilum* and *Bifidobacterium*  
792           *pseudolongum* strains: Broth microdilution vs. agar disc diffusion assay. *Int J Food Microbiol*  
793           **120**:191–195.
- 794   73.   **R Core Team**. 2016. R: A language and environment for statistical computing. R Foundation for  
795           Statistical Computing, Vienna, Austria.
- 796   74.   **Wickham H**. 2009. *ggplot2*Elegant Graphics for Data Analysis.
- 797   75.   **Yu G, Smith DK, Zhu H, Guan Y, Lam TTY**. 2016. *ggtree*: An r package for visualization and  
798           annotation of phylogenetic trees with their covariates and other associated data. *Methods Ecol*  
799           *Evol* **28**–36.
- 800   76.   **Carver T, Berriman M, Tivey A, Patel C, Böhme U, Barrell BG, Parkhill J, Rajandream**  
801           **MA**. 2008. Artemis and ACT: Viewing, annotating and comparing sequences stored in a relational  
802           database. *Bioinformatics* **24**:2672–2676.
- 803   77.   **Sullivan MJ, Petty NK, Beatson SA**. 2011. *Easyfig*: A genome comparison visualizer.  
804           *Bioinformatics* **27**:1009–1010.
- 805

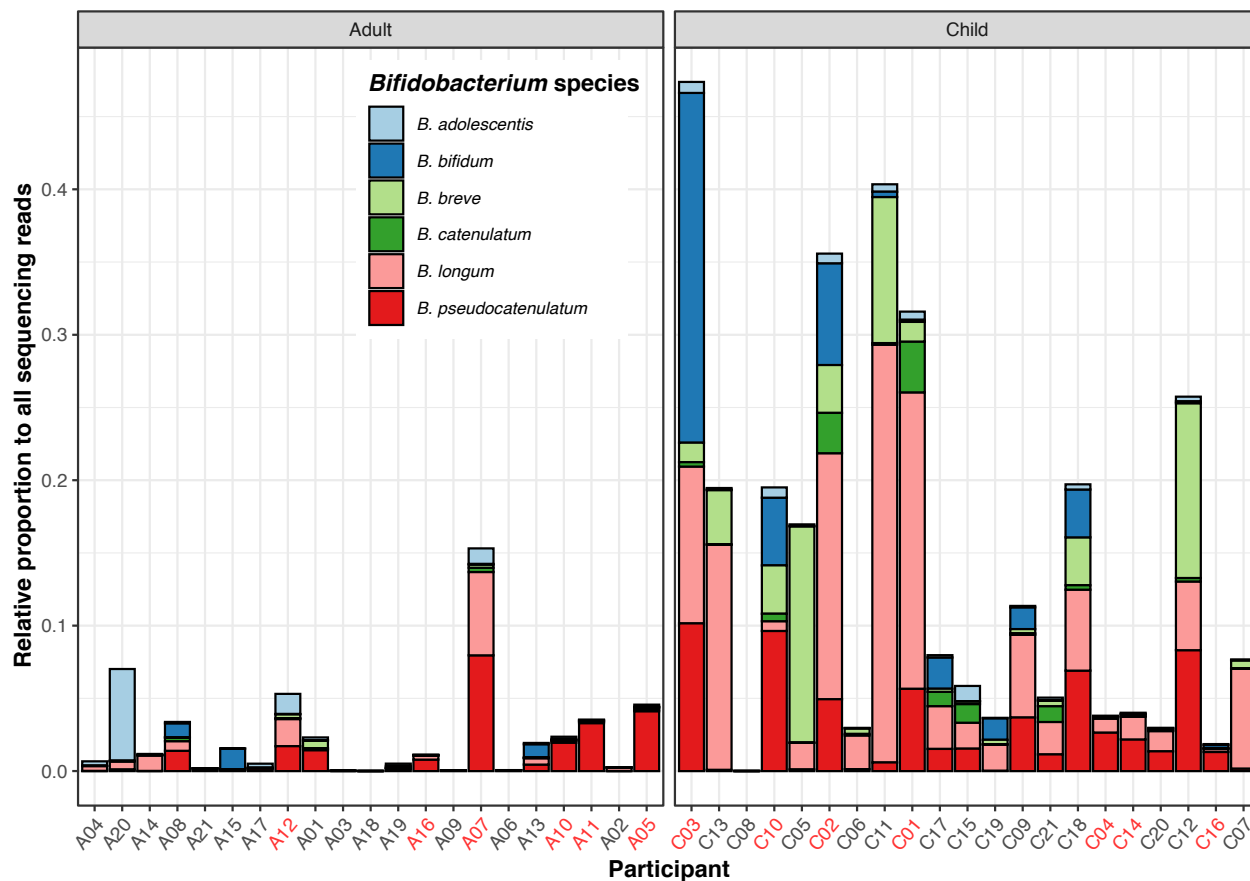

807  
 808 **Figure 1** Abundance of *Bifidobacterium* species in the gut microbiomes of a Vietnamese population. The figure displays the relative abundance of  
 809 *Bifidobacterium* (calculated as percentage of reads classified as *Bifidobacterium* by Kraken, relative to each sample's total sequencing reads) in  
 810 the gut microbiomes of adult (left) and child (right) participants (n=21 for each group). The sample names in each group are ordered based on the  
 811 participants' age, in increasing order. Samples labelled in red denote successful culture of laboratory-confirmed *B. pseudocatenulatum*. Different  
 812 *Bifidobacterium* species are colored as in the key.

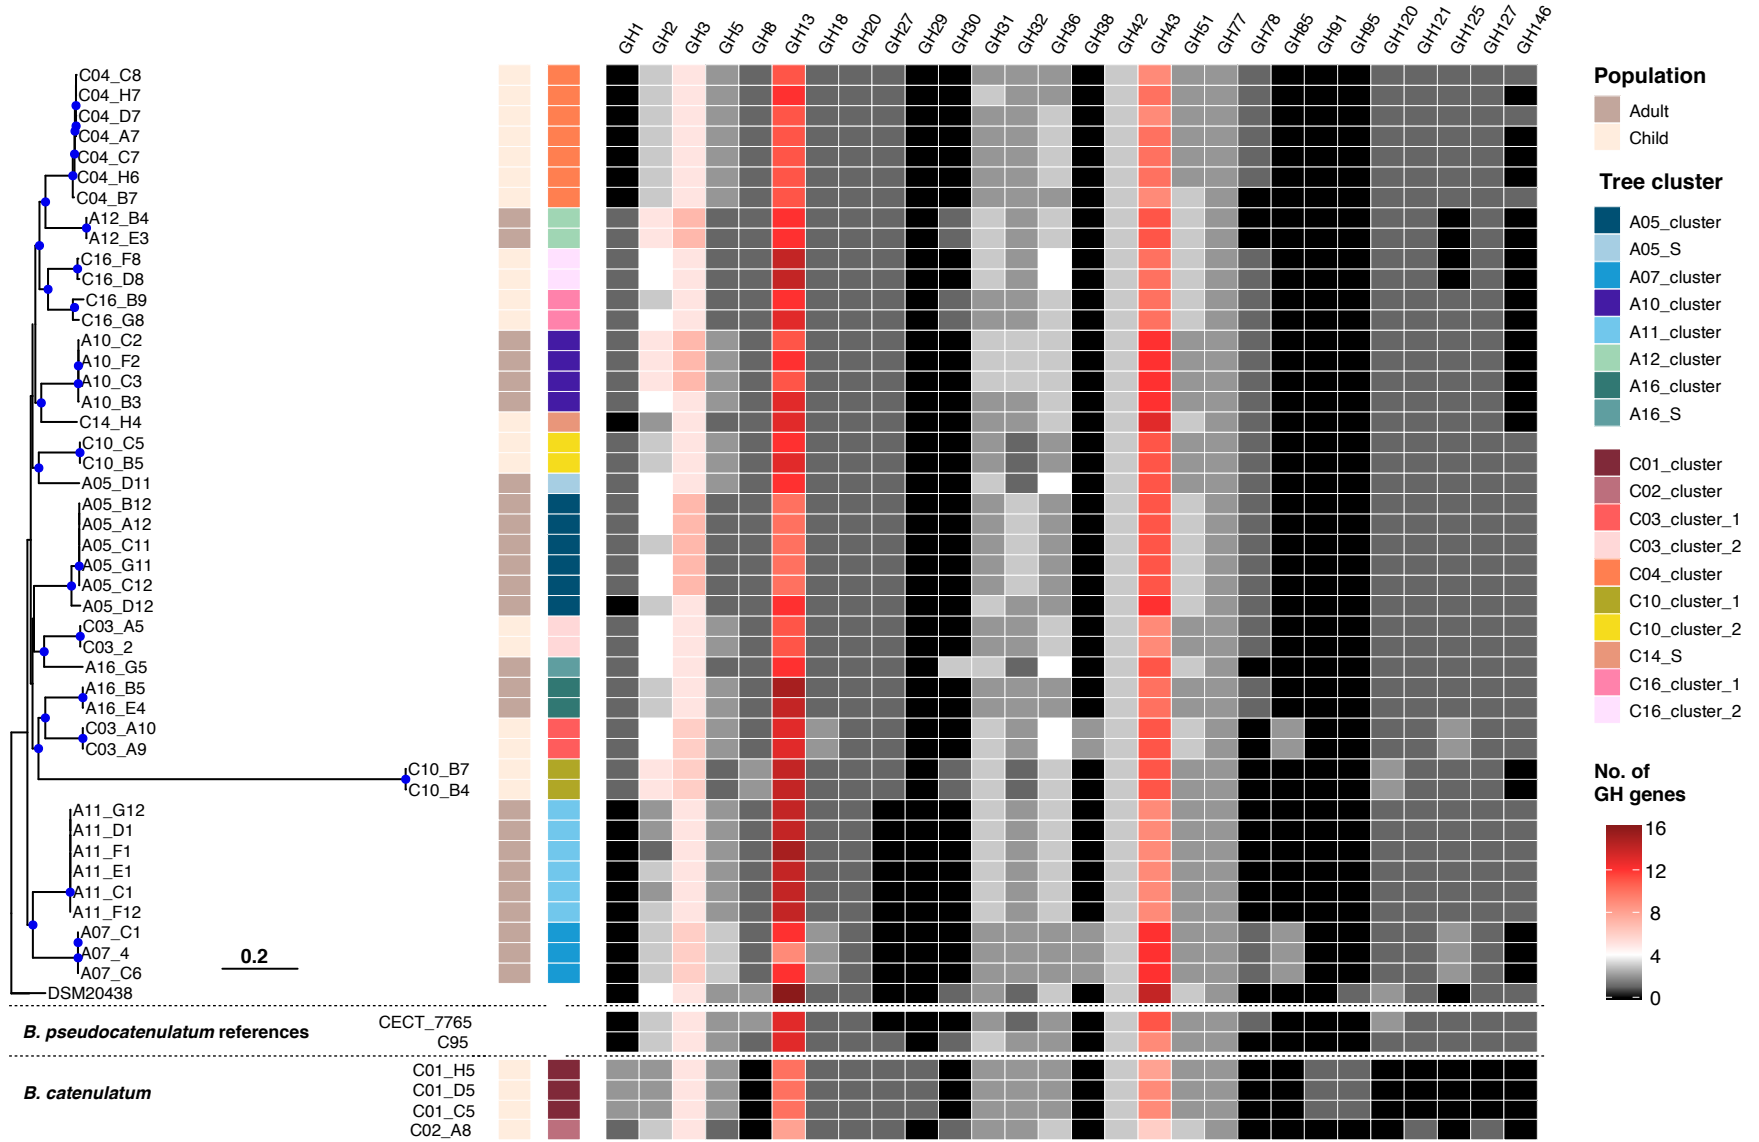

815 **Figure 2** The phylogeny and glycosyl hydrolase profile of Vietnamese *Bifidobacterium pseudocatenulatum*. The maximum likelihood phylogeny  
816 of 45 *B. pseudocatenulatum* isolated in this study was constructed from a recombination-free alignment following read mapping (See Methods).  
817 The tree is rooted using the reference DSM20438 as an outgroup, and blue filled circles denote bootstrap values greater than 70 at the internal  
818 nodes. Other *B. pseudocatenulatum* references (CECT\_7765 and the Chinese isolate C95) and *B. catenulatum* isolated in this study are included  
819 for comparison. The columns to the right of the phylogeny show the metadata associated with each taxon, including population, tree cluster  
820 nomenclature, and the numbers of gene belonging to each defined glycosyl hydrolase family (GH1, GH2, GH3, GH5, GH8, GH13, GH18, GH20,  
821 GH27, GH29, GH30, GH31, GH32, GH36, GH38, GH42, GH43, GH51, GH77, GH78, GH85, GH91, GH95, GH120, GH121, GH125, GH127,  
822 GH146). The quantity of these genes is denoted according to the key. The horizontal scale bar denotes the number of substitutions per site.  
823

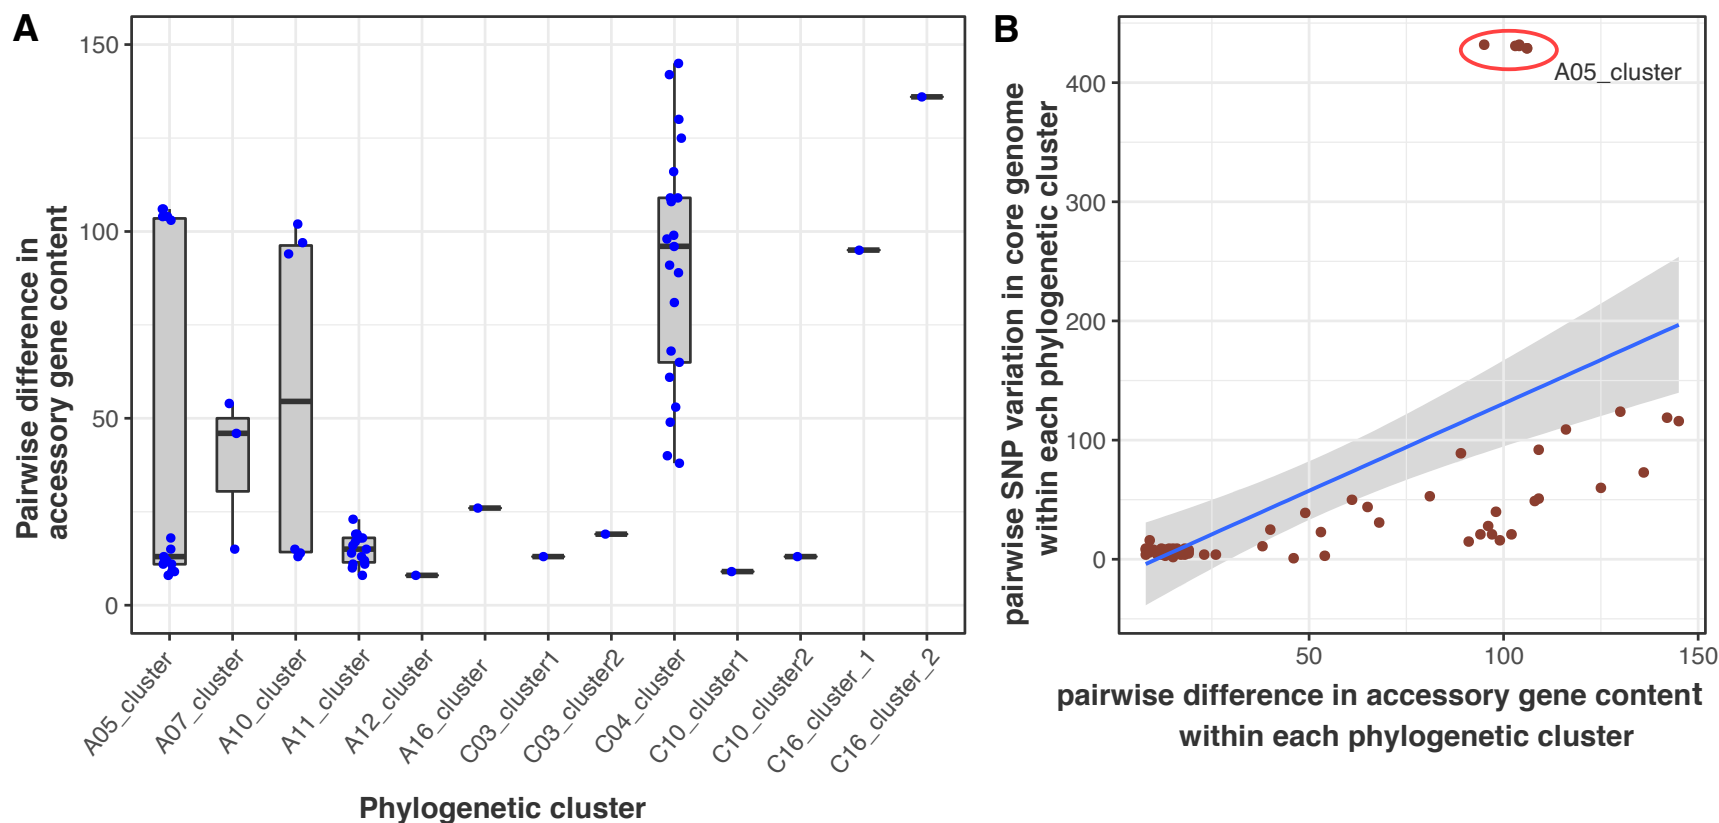

824

825 **Figure 3** Variation in the accessory genomes of *Bifidobacterium pseudocatenulatum*. (A) The panel depicts the distribution of pairwise differences  
 826 in the accessory gene content (counted as presence/absence, represented as blue circles) of isolates within each defined tree cluster. For each  
 827 boxplot, the upper whisker extends from the 75<sup>th</sup> percentile to the highest value within the 1.5 \* interquartile range (IQR) of the hinge, and the  
 828 lower whisker extends from the 25<sup>th</sup> percentile to the lowest value within the 1.5 \* IQR of the hinge. (B) The panel displays the positive  
 829 correlation between intra-clonal pairwise differences in the accessory gene content (x-axis) and intra-clonal pairwise variation of single nucleotide  
 830 polymorphisms (SNPs) in the core genome. The red circle indicates the outlier, A05\_cluster\_1.

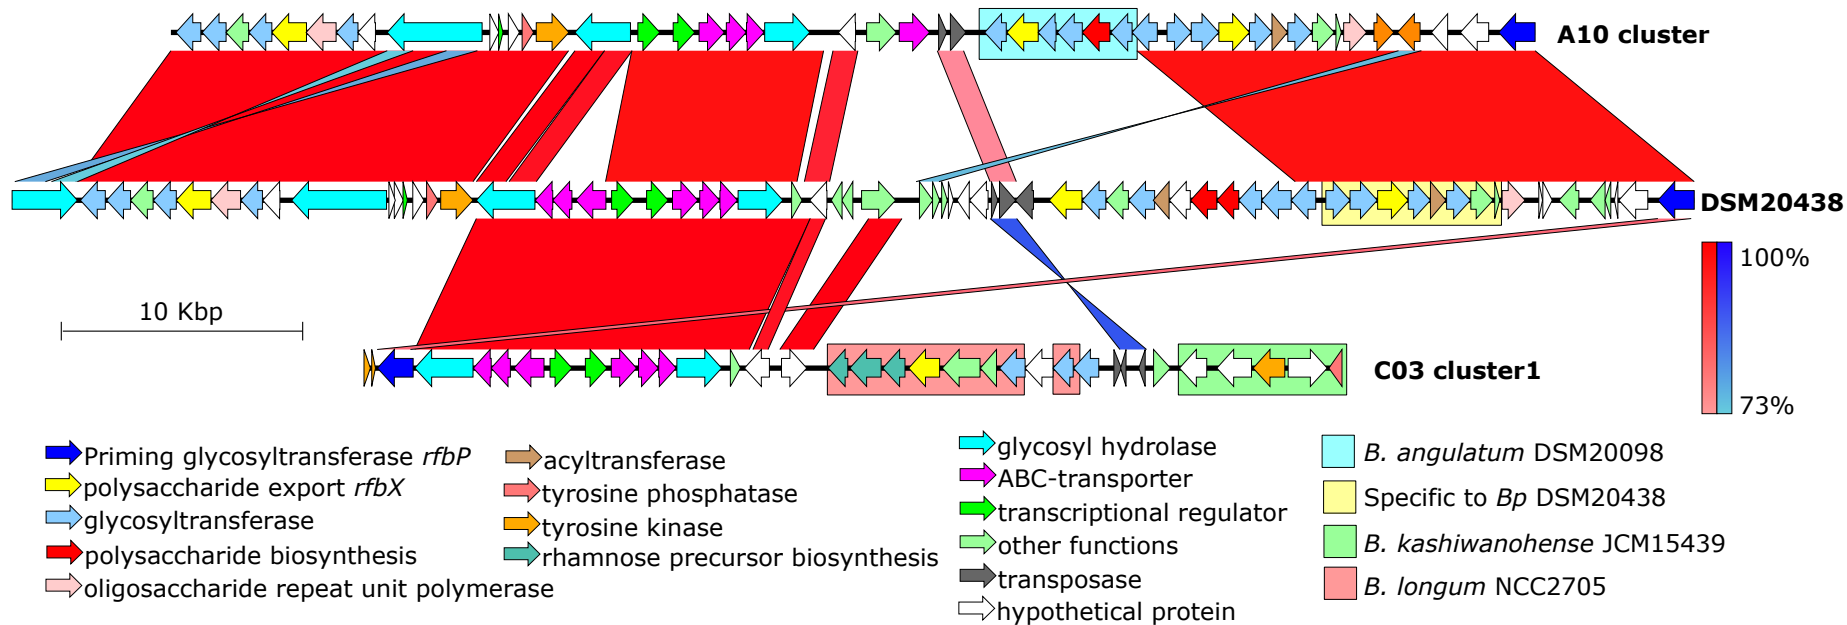

831

832 **Figure 4** Comparison of the exopolysaccharide (EPS) biosynthesis genomic region from exemplar *Bifidobacterium pseudocatenulatum* genomes.

833 Each arrow represents a predicted gene, with its function colored as in the keys. The blocks connecting two genomes indicate regions with high  
834 nucleotide similarity, either as synteny (red) or inversion (blue), with the color intensity corresponding to the degree of nucleotide similarity. The

835 colored boxes denote regions homologous to that found in specific *Bifidobacterium* species.

836

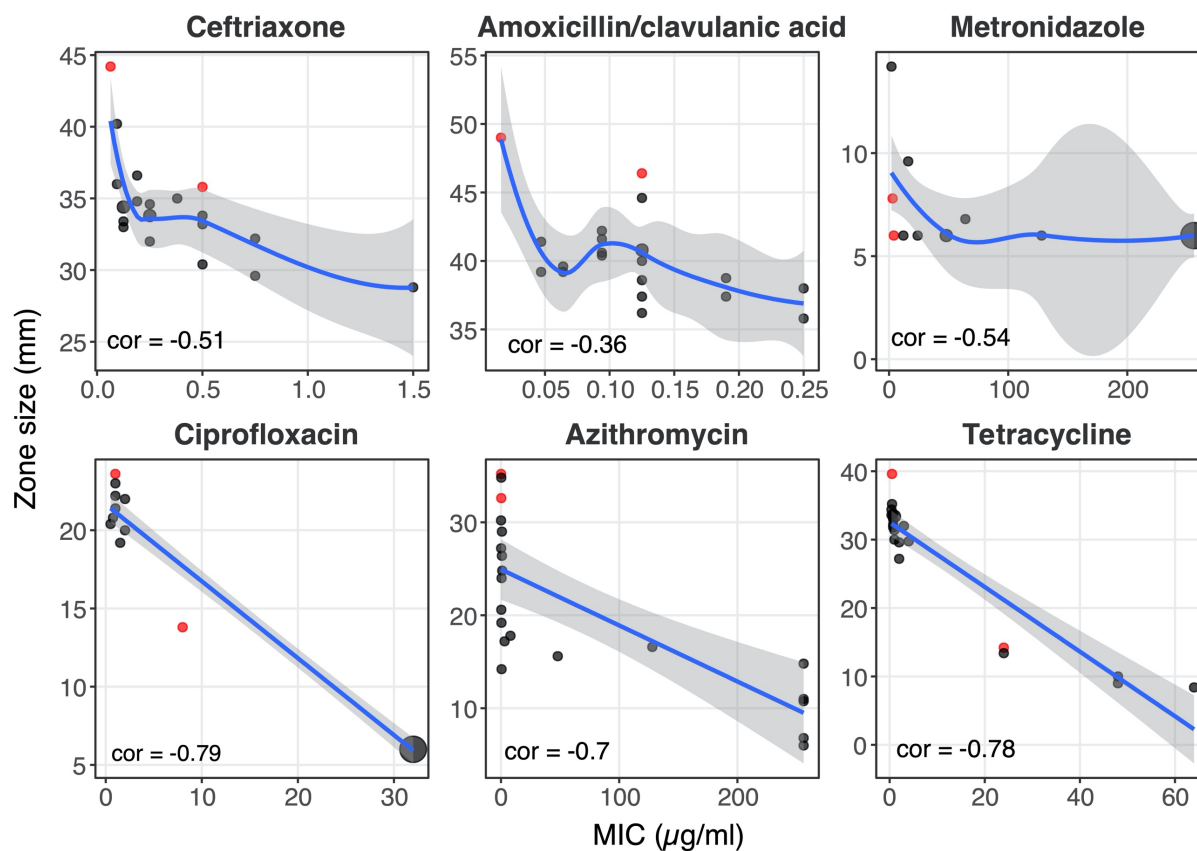

837

838 **Figure 5** Correlation between E-test and disc diffusion methods in antimicrobial susceptibility testing of *Bifidobacterium*. Each panel represents a  
 839 tested antimicrobial, with the x-axis and y-axis denoting the results of E-test (minimum inhibitory concentration in µg/ml) and disc diffusion  
 840 (inhibitory zone diameter in mm) approaches. Controls (*B. pseudocatenulatum* DSM20438 and *B. longum* NCIMB 8809) are colored in red, while  
 841 tested *Bifidobacterium* isolated in this study are colored in grey. The circle size is proportional to the number of isolates bearing the same MIC and  
 842 IZD, and the largest circles in metronidazole and ciprofloxacin panels correspond to eleven isolates. All correlation scores are calculated using  
 843 Kendall's correlation. LOESS regression is shown for ceftriaxone, amoxicillin/clavulanic acid, and metronidazole ( $cor > -0.7$ ), while linear  
 844 regression is shown for ciprofloxacin, azithromycin, and tetracycline ( $cor \leq -0.7$ ).



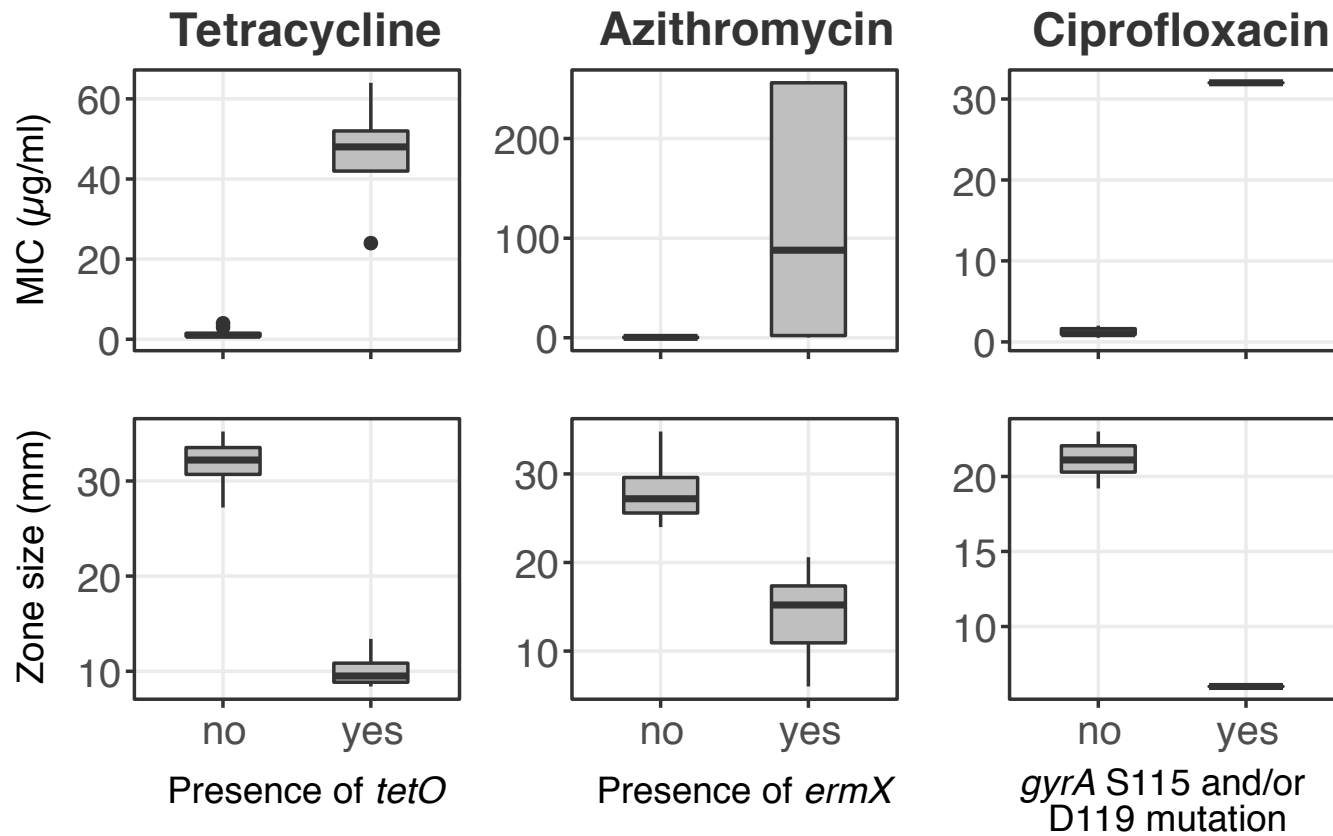

845

846 **Figure 6** Association between resistance determinants and antimicrobial testing results in *Bifidobacterium*. Each column displays the E-test  
 847 (minimum inhibitory concentration in µg/ml) and disc diffusion (inhibitory zone diameter in mm) results for a tested antimicrobial, classified  
 848 based on the presence of target resistance determinants (*tetO*, *ermX*, and *gyrA* S115 and/or D119 mutation).

849

| Group | Phylogenetic cluster | <i>Bp</i> DSM20438 ( <i>rfbX</i> , AT, 4 GTs, reductase, <i>fhiA</i> ) | Variable region                                                                                | Rhamnose biosynthesis |
|-------|----------------------|------------------------------------------------------------------------|------------------------------------------------------------------------------------------------|-----------------------|
| Ref   | CECT_7765            | -                                                                      | <i>B. longum</i> NCC2705 ( <i>rfbX</i> , GTs) and <i>B. kashiwanohense</i> JCM15439            | <i>rmlABC</i>         |
| Child | C03_cluster_1        | -                                                                      | <i>B. longum</i> NCC2705 ( <i>rfbX</i> , GTs) and <i>B. kashiwanohense</i> JCM15439            | <i>rmlABC</i>         |
|       | C03_cluster_2        | -                                                                      | <i>B. breve</i> lw01 ( <i>rfbX</i> , GTs, OAL)                                                 | -                     |
|       | C04_cluster          | -                                                                      | <i>B. gallinarum</i> CACC514 ( <i>rfbX</i> , GTs) and <i>B. kashiwanohense</i> PV20-2          | -                     |
|       | C10_cluster_1        | -                                                                      | Uncharacterized ( <i>rfbP</i> , <i>cpsD</i> , <i>rfbX</i> , GTs)                               | -                     |
|       | C10_cluster_2        | -                                                                      | Uncharacterized ( <i>rfbX</i> , GTs, AT)                                                       | -                     |
|       | C14_S                | Yes                                                                    | Uncharacterized ( <i>rfbX</i> , GTs, AT)                                                       | -                     |
|       | C16_cluster_1        | -                                                                      | <i>B. breve</i> JCM7017 ( <i>rfbX</i> , GTs) and Uncharacterized ( <i>rfbX</i> , GTs, AT)      | -                     |
|       | C16_cluster_2        | -                                                                      | <i>B. breve</i> JCM7017 ( <i>rfbX</i> , GTs) and Uncharacterized ( <i>rfbX</i> , GTs, AT)      | -                     |
| Adult | A05_cluster          | -                                                                      | <i>B. kashiwanohense</i> PV20-2 ( <i>rfbX</i> , GTs) and <i>B. longum</i> NCTC11818 (GTs, OAL) | -                     |
|       | A05_S                | Yes                                                                    | Uncharacterized ( <i>rfbX</i> , GTs, AT)                                                       | -                     |
|       | A07_cluster          | -                                                                      | <i>B. longum</i> 105-A ( <i>rfbX</i> , OAL, GTs)                                               | <i>rmlABC</i>         |
|       | A10_cluster          | Yes                                                                    | <i>B. angulatum</i> DSM20098 ( <i>rfbX</i> , GTs, OAL)                                         | -                     |
|       | A11_cluster          | Yes                                                                    | Uncharacterized ( <i>rfbX</i> , GTs, AT)                                                       | -                     |
|       | A12_cluster          | Yes                                                                    | Uncharacterized ( <i>rfbX</i> , GTs, AT)                                                       | -                     |
|       | A16_cluster          | -                                                                      | <i>B. longum</i> ZJ1 ( <i>rfbX</i> , GTs, OAL)                                                 | <i>rmlABC</i>         |
|       | A16_S                | Yes                                                                    | <i>B. angulatum</i> DSM20098 ( <i>rfbX</i> , GTs, OAL)                                         | -                     |

850  
851 **Table 1** Exopolysaccharide biosynthesis of *B. pseudocatenulatum*. GT: glycosyltransferase; AT: acyl-transferase; OAL: O-antigen ligase; *rfbX*: O-  
852 antigen transporter. *rfbP*, *cpsD*: Priming glycosyltransferase. *Bp*: *B. pseudocatenulatum*. Isolates with the same shading colour share similar EPS  
853 biosynthesis cluster.

854

| Anti-microbial | Number of strains with MIC ( $\mu\text{g/mL}$ ) |       |       |       |      |      |      |     |      |   |     |   |   |   |   |    |    |    |    |    |    |     |      |    |
|----------------|-------------------------------------------------|-------|-------|-------|------|------|------|-----|------|---|-----|---|---|---|---|----|----|----|----|----|----|-----|------|----|
|                | $\leq 0.047$                                    | 0.064 | 0.094 | 0.125 | 0.19 | 0.25 | 0.38 | 0.5 | 0.75 | 1 | 1.5 | 2 | 3 | 4 | 8 | 12 | 16 | 24 | 32 | 48 | 64 | 128 | >256 |    |
| <b>CRO</b>     |                                                 |       | 2     | 4     | 2    | 4    | 1    | 3   | 2    |   | 1   |   |   |   |   |    |    |    |    |    |    |     |      |    |
| <b>CIP</b>     |                                                 |       |       |       |      |      |      | 1   | 1    | 3 | 1   | 2 |   |   |   |    |    |    | 11 |    |    |     |      |    |
| <b>AMC</b>     | 2                                               | 2     | 4     | 7     | 2    | 2    |      |     |      |   |     |   |   |   |   |    |    |    |    |    |    |     |      |    |
| <b>AZM</b>     | 1                                               |       | 1     |       | 1    | 1    | 1    | 2   | 2    | 1 |     |   | 1 |   | 1 |    |    |    |    | 1  |    | 1   |      | 5  |
| <b>TET</b>     |                                                 |       |       |       |      |      | 2    | 1   | 4    | 4 |     | 2 | 1 | 1 |   |    |    | 1  |    | 2  | 1  |     |      |    |
| <b>MTZ</b>     |                                                 |       |       |       |      |      |      |     |      |   |     | 1 |   |   |   | 1  | 1  | 1  |    | 2  | 1  | 1   |      | 11 |

855

856 **Table 2** Summary of E-test results for 21 *Bifidobacterium* isolates (19 representative *B. pseudocatenulatum* and 2 controls). CRO: Ceftriaxone857 (30 $\mu\text{g}$ ); CIP: Ciprofloxacin (5 $\mu\text{g}$ ); AMC: amoxicillin/clavulanic acid (30 $\mu\text{g}$ ); AZM: azithromycin (15 $\mu\text{g}$ ); TET: tetracycline (30 $\mu\text{g}$ ); MTZ:858 metronidazole (5 $\mu\text{g}$ ).
